# Supplementary material for: The Imprinted Gene DIO3 Is a Candidate Gene for Litter Size in Pigs
Source: PLoS One. 2012 Feb 29;7(2):e31825. doi: 10.1371/journal.pone.0031825 (PMC3290540; doi:10.1371/journal.pone.0031825)
Supplement: Supplemental File S1 — Infomation of the markers and P-values for each marker. The list of markers shows the markers included in the analysis, with their position on the reference genome build 9, the region in which they were located and other information. The list of P-values of the markers shows the P-value for the Additive (A), Dominance (D) and Imprinting (I) effect of each marker in each analysis (four traits x two breeding companies). (XLS) [file pone.0031825.s001.xls]

## Sheet: Markers
chromosome	region	marker_id	~position marker in pig genome build 9	BAC, acc# and name	imprinted genes in region	expressed allele human/mouse/pig	~position gene in pig genome build 9 or name BAC clone(s)
1	1_1	ALGA0000621	7508090		IGF2R	polymorphic/maternal/maternal	8,497,941-8,600,764
1	1_1	ASGA0000687	7544170		Air	unknown/paternal/unknown
1	1_1	ALGA0000633	7576350		SLC22A2	polymorphic/maternal/unknown	8,293,987-8,324,160
1	1_1	INRA0000377	7607609		SLC22A3	polymorphic/maternal/maternal	8,129,892-8,225,152
1	1_1	ALGA0000641	7654791
1	1_1	ASGA0000696	7695035
1	1_1	ASGA0000699	7737264
1	1_1	H3GA0000571	7817246
1	1_1	ASGA0000707	7916661
1	1_1	H3GA0000572	7930487
1	1_1	ALGA0000674	8277775
1	1_1	MARC0000408	8294583
1	1_1	ALGA0000669	8331486
1	1_1	ALGA0000672	8357312
1	1_1	MARC0027776	8480183
1	1_1	ALGA0000681	8658312
1	1_1	INRA0000412	8666566
1	1_1	ASGA0000724	8676298
1	1_1	BGIS0001145	8710296
1	1_1	DBWU0000005	8720827
1	1_1	ALGA0000684	8742405
1	1_1	MARC0089489	8755915
1	1_1	ALGA0000689	8832155
1	1_1	H3GA0000600	8875422
1	1_1	M1GA0000626	8925496
1	1_1	ASGA0000735	8933057
1	1_2	ASGA0001565	22093192		PLAGL1	paternal/paternal/paternal	22,330,280-22,350,417
1	1_2	ALGA0001621	22132285		HYMAI	paternal/paternal/unknown	22,283,647-22,286,180
1	1_2	INRA0001080	22155594
1	1_2	DRGA0000219	22183458
1	1_2	ASGA0001574	22200886
1	1_2	H3GA0001098	22233756
1	1_2	DRGA0000221	22252942
1	1_2	ASGA0001581	22343037
1	1_2	MARC0080144	22378404
1	1_2	ALGA0001641	22544854
1	1_2	ALGA0001639	22574947
1	1_2	ASGA0001584	22612382
1	1_2	ALGA0001635	22614601
1	1_2	H3GA0001101	22642024
1	1_2	MARC0004884	22654225
1	1_2	ALGA0001645	22689034
1	1_2	ALGA0001649	22717458
1	1_2	ASGA0001594	22730004
1	1_2	ASGA0001599	22758734
1	1_2	ALGA0001660	22785838
1	1_3	ASGA0004677	147581501		PEG12	gene absent/paternal/unknown
1	1_3	H3GA0002857	147585007		MKRN3	paternal/paternal/unknown	149,905,497-149,906,960
1	1_3	INRA0004393	147669495		ZNF127AS	unknown/maternal/unknown
1	1_3	ALGA0006172	147690767		MAGEL2	paternal/paternal/unknown	149,858,257-149,860,281
1	1_3	DRGA0001552	147759053		NDN	paternal/paternal/paternal	149,818,927-149,819,906
1	1_3	ALGA0006195	147809379		AK014392	unknown/paternal/unknown
1	1_3	H3GA0002860	147852951		BM117114	gene absent/paternal/unknown
1	1_3	ALGA0006180	147947377		PEC2	unknown/paternal/unknown
1	1_3	ALGA0006191	147959997		BB077283	gene absent/paternal/unknown
1	1_3	H3GA0002865	148087511		PEC3	unknown/paternal/unknown
1	1_3	INRA0004415	148121550		NCCR	unknown/paternal/unknown
1	1_3	ALGA0006200	148190378		PWRN1	paternal/gene absent/unknown
1	1_3	INRA0004425	148227164		C15ORF2	paternal/gene absent/unknown
1	1_3	ASGA0004699	148264829		SNURF	paternal/paternal/unknown
1	1_3	ASGA0004701	148352092		SNRPN	paternal/paternal/paternal
1	1_3	INRA0004428	148417445		SNORD107	paternal/paternal/paternal
1	1_3	ASGA0004702	148514325		SNORD64	paternal/paternal/unknown
1	1_3	ASGA0004706	148592021		SNORD108	paternal/gene absent/unknown
1	1_3	ALGA0006210	148628013		SNORD109A	paternal/gene absent/unknown	149,430,254-149,430,320
1	1_3	H3GA0002876	148666860		SNORD116@	paternal/paternal/unknown	149,514,737-149,514,828
1	1_3	H3GA0002880	148691179		SNORD115@	paternal/paternal/unknown	149,448,280-149,448,360
1	1_3	ALGA0006219	148718702		SNORD109B	paternal/gene absent/unknown
1	1_3	ASGA0004715	148773077		UBE3A-AS	paternal/paternal/paternal
1	1_3	INRA0004442	148818583		UBE3A	maternal/maternal/unknown	149,311,628-149,409,522
1	1_3	ASGA0004723	149055911		ATP10A	maternal/conflict evidence/unknown	149,061,228-149,111,747
1	1_3	MARC0010520	149060907		GABRB3	conflict evidence/paternal/unknown	148,680,723-148,698,265
1	1_3	ALGA0006230	149075327		GABRA5	conflict evidence/paternal/unknown	148,288,481-148,352,563
1	1_3	H3GA0002892	149136173		GABRG3	conflict evidence/paternal/unknown
1	1_3	H3GA0002893	149180643
1	1_3	ASGA0004729	149413618
1	1_3	H3GA0002894	149442445
1	1_3	ASGA0004731	149458456
1	1_3	H3GA0002895	149637885
1	1_3	INRA0004458	149656443
1	1_3	ALGA0006239	149832739
1	1_3	INRA0004459	150031229
1	1_3	ALGA0006243	150339021
1	1_3	ALGA0006244	150418379
2	2_1	M1GA0025589	5126		H19	maternal/maternal/maternal
2	2_1	ASGA0084177	16340		IGF2	paternal/paternal/paternal	RP44-516D23
2	2_1	ASGA0099540	97993		IGF2AS	paternal/paternal/paternal
2	2_1	ASGA0088012	164344		INS	paternal/paternal/unknown	RP44-516D23
2	2_1	H3GA0053629	207378		TH	unknown/maternal/unknown	RP44-516D23
2	2_1	ASGA0083718	243579		ASCL2	conflict evidence/maternal/unknown	RP44-516D23 and RP44-467B2
2	2_1	CAMB0000291	293497		TSPAN32	biallelic/maternal/unknown	RP44-516D23 and RP44-467B2
2	2_1	DBWU0000554*	300000	AC151880.1/RP44-516D23	CD81	biallelic/maternal/biallelic	RP44-467B2
2	2_1	MARC0022082*	307000	AC151880.1/RP44-516D23	TSSC4	biallelic/maternal/unknown	RP44-467B2
2	2_1	DBWU0000561*	314000	AC151880.1/RP44-516D23	TRPM5	paternal/unknown/unknown	RP44-467B2 and RP44-475H2
2	2_1	MARC0113257*	321000	AC151880.1/RP44-516D23	KCNQ1OT1	paternal/paternal/unknown
2	2_1	DBWU0000553*	328000	AC151880.1/RP44-516D23	KCNQ1	maternal/maternal/unknown	RP44-475H2
2	2_1	M1GA0027267*	335000	AC151879.1/RP44-467B2	KCNQ1DN	maternal/gene absent/unknown
2	2_1	ASGA0103371*	342000	AC151882.1/RP44-263P5	CDKN1C	maternal/maternal/maternal	RP44-313I15 and RP44-332N9
2	2_1	M1GA0026183*	349000	AC151882.1/RP44-263P5	AF313042	gene absent/maternal/unknown
2	2_1	ASGA0084475*	356000	AC151882.1/RP44-263P5	SLC22A18AS	maternal/unknown/unknown
2	2_1	SIRI0001294*	362000	AC151878.1/RP44-332N9	SLC22A18	maternal/maternal/unknown	366,376-371,582
2	2_1	MARC0066239	369391		PHLDA2	maternal/maternal/maternal	382,903-383,749
2	2_1	MARC0066630	398246		NAP1L4	unknown/maternal/unknown	395,740-421,651
2	2_1	CASI0008418	738026		Tnfrsf23	gene absent/maternal/unknown
2	2_1	ASGA0098481	765083		OSBPL5	maternal/maternal/maternal	588,356-618,322
2	2_1	ASGA0091920	897698
2	2_1	ASGA0094493	921593
2	2_1	ASGA0088147	979644
2	2_1	ASGA0090419	1019554
2	2_1	INRA0061709	1133254
2	2_1	MARC0113936	1135748
2	2_1	MARC0095813	1141764
2	2_1	ALGA0112481	1145406
2	2_1	INRA0008086	1192650
2	2_1	ALGA0011347	1227337
2	2_1	MARC0056592	1230740
2	2_1	INRA0008077	1238201
2	2_1	H3GA0005490	1261142
2	2_1	INRA0008082	1302856
2	2_1	ASGA0008398	1309010
2	2_1	INRA0059396	1398953
2	2_1	INRA0060703	1597775
2	2_2	ALGA0012816	26039148		WT1-Alt trans	paternal/unknown/unknown	26,543,912-26,544,559
2	2_2	MARC0002205	26184211		WIT1	paternal/gene absent/unknown
2	2_2	MARC0097248	26249922
2	2_2	ALGA0100322	26261453
2	2_2	DRGA0002877	26350348
2	2_2	DIAS0001431	26441024
2	2_2	ALGA0012822	26472078
2	2_2	ASGA0009800	26523916
2	2_2	ALGA0012826	26551749
2	2_2	ASGA0009803	26574889
2	2_2	ALGA0012830	26584900
2	2_2	ALGA0012835	26607129
2	2_2	H3GA0006444	26639392
2	2_2	MARC0093618	26660308
2	2_2	ASGA0009814	26664963
2	2_2	ASGA0009826	26685430
2	2_2	ASGA0009823	26769301
2	2_2	H3GA0006445	26791522
2	2_2	INRA0008514	26802092
2	2_2	ASGA0009833	26896574
5	5_1	ASGA0026382	72660938		SLC38A4	unknown/paternal/maternal-paternal pig	72,848,112-72,859,781
5	5_1	ALGA0033024	72696625
5	5_1	H3GA0016893	72748111
5	5_1	ASGA0026387	72775396
5	5_1	H3GA0016895	72794366
5	5_1	ALGA0033038	72804676
5	5_1	ASGA0026395	72808305
5	5_1	INRA0020046	72819227
5	5_1	MARC0031687	72825677
5	5_1	INRA0020050	72842292
5	5_1	ALGA0033048	72860302
5	5_1	H3GA0056714	73259122
5	5_1	ASGA0099577	73272657
5	5_1	INRA0057593	73294811
5	5_1	MARC0051550	73303023
5	5_1	ASGA0092757	73353813
5	5_1	ALGA0119342	73367741
5	5_1	INRA0057837	73417905
5	5_1	ALGA0106378	73418994
5	5_1	DIAS0003881	73419000
6	6_1	DRGA0006943	101022301		DIRAS3	paternal/gene absent/paternal	102,144,431-102,146,910
6	6_1	INRA0022467	101029804
6	6_1	INRA0022470	101802788
6	6_1	ASGA0029647	101855185
6	6_1	ALGA0037079	101899650
6	6_1	H3GA0018934	101912026
6	6_1	ALGA0037082	101945268
6	6_1	ASGA0029648	101974395
6	6_1	H3GA0018935	102000832
6	6_1	ASGA0029650	102010952
6	6_1	H3GA0018938	102028540
6	6_1	ASGA0029651	102082802
6	6_1	M1GA0008917	102126557
6	6_1	ALGA0037090	102177581
6	6_1	BGIS0002334	102204131
6	6_1	CAMB0000281	102223506
6	6_1	ALGA0037091	102255291
6	6_1	ASGA0029653	102267709
6	6_1	H3GA0018940	102268988
6	6_1	ALGA0037093	102293118
7	7_1	ALGA0045777	131900682		BEGAIN (imprint sheep)	unknown/unknown/unknown	134,296,369-134,299,013
7	7_1	DIAS0001804	131935270		DLK1	paternal/paternal/paternal	134,213,139-134,319,422
7	7_1	H3GA0023820	131958609		MICO1	unknown/maternal/unknown
7	7_1	H3GA0023828	132016454		MICO1os	unknown/maternal/unknown
7	7_1	ASGA0037212	132117487		MEG3	maternal/maternal/maternal	134,048,271-134,064,908
7	7_1	H3GA0023839	132148330		miR-337	unknown/maternal/unknown
7	7_1	ASGA0037226	132227963		RTL1	unknown/paternal/unknown	133,927,224-133,930,409
7	7_1	M1GA0011374	132259005		anti-Rtl1	unknown/maternal/unknown
7	7_1	H3GA0023850	132287711		miR-431	unknown/maternal/unknown
7	7_1	ASGA0037231	132368218		miR-433	unknown/maternal/unknown
7	7_1	ASGA0037233	132388887		miR-127	unknown/maternal/unknown
7	7_1	ALGA0045832	132478936		miR-434	unknown/maternal/unknown
7	7_1	MARC0064679	132550043		miR-432	unknown/maternal/unknown
7	7_1	M1GA0011383	132599220		miR-136	unknown/maternal/unknown
7	7_1	ALGA0045841	132780124		MEG8	unknown/maternal/unknown	133,977,394-133,977,456		133977456
7	7_1	M1GA0011398	132788104		miR-370	unknown/maternal/unknown
7	7_1	M1GA0011391	132812065		MBII-78	gene absent/maternal/unknown
7	7_1	ALGA0045847	132852784		MBII-19	gene absent/maternal/unknown
7	7_1	M1GA0011405	132881242		MBII-48	unknown/maternal/unknown
7	7_1	ALGA0045855	132933942		MBII-49	gene absent/maternal/unknown
7	7_1	ASGA0037263	132999395		MBII-426	gene absent/maternal/unknown
7	7_1	M1GA0011429	133076253		MBII-343	unknown/maternal/unknown
7	7_1	ASGA0037273	133092465		MIRG	unknown/maternal/unknown
7	7_1	ASGA0037284	133221216		miR-411	unknown/maternal/unknown
7	7_1	SIRI0001039	133228046		miR-380	unknown/maternal/unknown
7	7_1	ALGA0115984	133917668		miR-376b	unknown/maternal/unknown
7	7_1	MARC0045334	133942265		miR-376	unknown/maternal/unknown
7	7_1	ASGA0089052	133949621		miR-134	unknown/maternal/unknown
7	7_1	ASGA0094477	133965020		miR-154	unknown/maternal/unknown
7	7_1	H3GA0023922	134021156		miR-410	unknown/maternal/unknown
7	7_1	ALGA0045891	134207246		DIO3	unknown/paternal/paternal	132,202,057-132,202,893
7	7_1	ASGA0037311	134221852
7	7_1	ALGA0045902	134226663
7	7_1	ALGA0045916	134845779
7	7_1	H3GA0023937	134950290
7	7_1	ALGA0045929	135023021
7	7_1	ASGA0037322	135371198
7	7_1	ASGA0037327	135423036
8	8_1	H3GA0025546	111658728		NAP1L5	paternal/paternal/paternal	112,057,551-112,058,138
8	8_1	ASGA0040074	111681632
8	8_1	ALGA0049801	111707997
8	8_1	ASGA0040077	111727744
8	8_1	ALGA0049804	111762940
8	8_1	ASGA0040084	111980020
8	8_1	ASGA0040080	111996696
8	8_1	MARC0098423	112007508
8	8_1	ALGA0049819	112030527
8	8_1	ALGA0049826	112043634
8	8_1	DRGA0008893	112053693
8	8_1	ALGA0049832	112085664
8	8_1	MARC0029617	112096898
8	8_1	M1GA0012074	112125179
8	8_1	ASGA0096320	112167422
8	8_1	ALGA0114256	112214019
8	8_1	ALGA0115608	112223563
8	8_1	ALGA0117031	112233556
8	8_1	ALGA0105059	112258259
8	8_1	ASGA0086196	112450238
9	9_1	DRGA0009466	67985866		CALCR	maternal/maternal/biallelic	68,503,267-68,547,328
9	9_1	DRGA0009468	68094404		TFPI2	maternal/maternal/maternal	68,969,355-68,974,254
9	9_1	ALGA0053835	68244704		SGCE	paternal/paternal/paternal	69,730,669-69,802,813
9	9_1	H3GA0027792	68304913		PEG10	paternal/paternal/paternal	69,772,684-69,778,202
9	9_1	ISU10000738	68514941		PPP1R9A	maternal/maternal/maternal	70,143,845-70,145,786
9	9_1	ALGA0053842	68628424		PON1	paternal/biallelic/unknown	70,200,746-70,266,651
9	9_1	INRA0032051	68727884		PON3	unknown/maternal/unknown
9	9_1	ALGA0053844	68806237		PON2	unknown/maternal/maternal	70,176,701-70,195,601
9	9_1	ASGA0043776	68975805		ASB4	unknown/maternal/unknown	70,340,992-70,423,150
9	9_1	MARC0004886	69363075		DLX5	maternal/maternal/maternal	RP44-524H20
9	9_1	ASGA0043784	69449508
9	9_1	H3GA0055357	69673016
9	9_1	ALGA0105770	69807002
9	9_1	ALGA0053846	69946652
9	9_1	DRGA0009480	70025539
9	9_1	ALGA0053853	70143230
9	9_1	ASGA0043790	70260776
9	9_1	ASGA0043789	70290879
9	9_1	ASGA0043797	70336618
9	9_1	ALGA0053857	70364352
9	9_1	ASGA0043793	70416574
9	9_1	ASGA0043799	70482147
9	9_1	DRGA0009488	70549704
9	9_1	ALGA0053869	70661921
9	9_1	H3GA0027810	70734147
9	9_1	ASGA0043815	70769819
9	9_1	DRGA0009489	70814227
9	9_1	ASGA0043821	71291186
9	9_1	ALGA0053889	71348992
9	9_1	ALGA0053892	71482284
9	9_1	DRGA0009493	71548429
9	9_1	ALGA0053897	71597254
9	9_1	H3GA0027814	71648736
9	9_1	ALGA0105557	71700000
9	9_1	INRA0061492	71780000
9	9_1	ASGA0043828	71833310
9	9_1	MARC0075893*	71954309	AC232919/RP44-524H20
9	9_1	ALGA0053907*	71984074	AC232919/RP44-524H20
9	9_2	MARC0053023	128234272		DDC	unknown/paternal/unknown	128,434,077-128,459,258
9	9_2	MARC0058716	128290836		GRB10	isoform dependent hs and mm/unknown	128,470,773-128,506,676
9	9_2	ASGA0091887	128308902
9	9_2	MARC0020813	128319022
9	9_2	H3GA0055246	128332975
9	9_2	ALGA0105103	128345979
9	9_2	DBUN0000033	128436398
9	9_2	ASGA0092201	128465657
9	9_2	MARC0018051	128496208
9	9_2	M1GA0027225	128501484
9	9_2	MARC0063577	128522173
9	9_2	ASGA0100063	128522999
9	9_2	ASGA0086088	128550010
9	9_2	ALGA0105376	128573258
9	9_2	MARC0028384	128583600
9	9_2	ASGA0045354	129026318
9	9_2	H3GA0028761	129043057
9	9_2	ALGA0055961	129090575
9	9_2	ASGA0045364	129098518
9	9_2	MARC0060357	129119986
14	14_1	M1GA0019286	135277494		INPP5F	paternal/paternal/paternal	135,561,993-135,653,575
14	14_1	ASGA0067046	135313545
14	14_1	DRGA0014702	135339744
14	14_1	H3GA0042706	135384153
14	14_1	INRA0047826	135403671
14	14_1	BGIS0004175	135430870
14	14_1	ASGA0067062	135486884
14	14_1	ASGA0067067	135510836
14	14_1	ALGA0082334	135538049
14	14_1	INRA0047840	135553382
14	14_1	INRA0047841	135587091
14	14_1	DRGA0014710	135625904
14	14_1	INRA0047845	135647321
14	14_1	ASGA0067076	135676958
14	14_1	ASGA0067078	135700120
14	14_1	ALGA0082346	135736681
14	14_1	ALGA0082355	135781357
14	14_1	ASGA0067094	135812243
14	14_1	ALGA0082360	135842872
14	14_1	M1GA0019306	135884418
17	17_1	ALGA0095028	42431076		NNAT	paternal/paternal/paternal	42,973,883-42,976,133
17	17_1	H3GA0048953	42531824
17	17_1	ALGA0095032	42539609
17	17_1	INRA0053914	42580927
17	17_1	ALGA0095033	42609637
17	17_1	ALGA0095034	42653596
17	17_1	ALGA0095036	42660964
17	17_1	ALGA0095037	42675748
17	17_1	ASGA0076985	42865185
17	17_1	ASGA0076974	42901823
17	17_1	H3GA0048969	42916263
17	17_1	ASGA0076980	42951271
17	17_1	ALGA0095058	42960253
17	17_1	H3GA0048967	43001239
17	17_1	ALGA0095040	43023463
17	17_1	ASGA0076988	43187837
17	17_1	ALGA0095080	43225403
17	17_1	H3GA0048983	43236197
17	17_1	INRA0053929	43259930
17	17_1	ASGA0077003	43268263
17	17_2	M1GA0022641	61385794		Nespas	paternal/paternal/unknown
17	17_2	ASGA0078301	61407683		GNAS	maternal/maternal/unknown	61,615,817-61,669,884
17	17_2	INRA0054886	61465322
17	17_2	H3GA0050000	61477555
17	17_2	MARC0028613	61482349
17	17_2	ALGA0096471	61503376
17	17_2	H3GA0050013	61554614
17	17_2	M1GA0022670	61575098
17	17_2	ALGA0096479	61601503
17	17_2	M1GA0022677	61632826
17	17_2	M1GA0022679	61642109
17	17_2	M1GA0022686	61686411
17	17_2	ALGA0096492	61715122
17	17_2	H3GA0050036	61754760
17	17_2	INRA0054903	61785181
17	17_2	ALGA0096504	61811025
17	17_2	INRA0054909	61836756
17	17_2	ASGA0078341	61859044
17	17_2	ALGA0096511	61900937
17	17_2	H3GA0050045	61936357
18	18_1	ALGA0097266	15759417		CPA4	maternal/unknown/unknown	16,579,822-16,592,749
18	18_1	ALGA0097267	15772320		MEST	paternal/paternal/paternal	16,496,940-16,510,729
18	18_1	ASGA0079076	15790975		MIRN335	unknown/unknown/unknown	16,506,719-16,506,776
18	18_1	ASGA0079077	15819335		MESTIT1	paternal/gene absent/unknown
18	18_1	INRA0055344	15821795		COPG2IT1	paternal/paternal/unknown	16,416,500-16,418.500
18	18_1	ASGA0079079	15823236		COPG2	conflicting data/paternal/maternal	16,419,268-16,458,562
18	18_1	DRGA0016901	15854744		KLF14	maternal/maternal/unknown	16,286,478-16,287,459
18	18_1	ASGA0079081	15931040
18	18_1	ASGA0090721	16139525
18	18_1	ALGA0097273	16391989
18	18_1	ASGA0079084	16424961
18	18_1	ALGA0097275	16498084
18	18_1	ALGA0097276	16590789
18	18_1	INRA0055347	16648902
18	18_1	H3GA0050487	16687509
18	18_1	ALGA0097278	16870641
18	18_1	INRA0055348	16884717
18	18_1	ASGA0079087	16953648
18	18_1	ALGA0097282	16987684
18	18_1	ASGA0079088	16991331
18	18_1	INRA0055349	16999892
18	18_1	ASGA0079089	17057553
18	18_1	INRA0055352	17076488
18	18_1	ASGA0079090	17142081
18	18_1	ALGA0097286	17184880
18	18_1	ALGA0097287	17189883

## Sheet: P-values
				C1			C2
chromosome	region	marker_id	trait	A	D	I	A	D	I
1	1_1	ALGA0000621	LW	1	0.525458	0.255436	0.0361542	0.139482	0.415013
1	1_1	ALGA0000621	TW	0.804447	0.609152	0.150127	0.016728	0.0648371	0.606565
1	1_1	ALGA0000621	LB	0.739279	0.849953	0.421667	0.0355424	0.573209	0.395806
1	1_1	ALGA0000621	TB	0.786485	0.204454	0.430757	0.0732856	0.469314	0.475748
1	1_1	ALGA0000633	LW	0.140943	0.402316	0.490004	0.941972	0.179147	0.149425
1	1_1	ALGA0000633	TW	0.100489	0.464175	0.608177	0.82714	0.387194	0.212078
1	1_1	ALGA0000633	LB	0.558484	0.720047	0.560675	0.697795	0.366912	0.365123
1	1_1	ALGA0000633	TB	0.741335	0.44344	0.289028	0.86137	0.520592	0.238145
1	1_1	ALGA0000641	LW	0.0685396	0.0352377	0.424026	0.324143	0.289783	0.64808
1	1_1	ALGA0000641	TW	0.105376	0.0772687	0.627722	0.264661	0.318709	0.896277
1	1_1	ALGA0000641	LB	0.0529607	1	0.81231	0.418953	0.430098	0.966161
1	1_1	ALGA0000641	TB	0.136278	0.992023	0.748893	0.352156	0.252254	0.952159
1	1_1	ALGA0000669	LW	0.394803	0.391313	0.331979	0.844664	0.181535	0.193873
1	1_1	ALGA0000669	TW	0.68099	0.757116	0.287817	0.763704	0.0276033	0.0653494
1	1_1	ALGA0000669	LB	0.24004	0.905161	0.915731	0.107708	0.442469	0.683625
1	1_1	ALGA0000669	TB	0.230675	0.519888	0.763202	0.168723	0.297228	0.71866
1	1_1	ALGA0000672	LW	0.197764	0.660216	0.394358	0.382633	0.662304	0.16127
1	1_1	ALGA0000672	TW	0.0886206	0.963476	0.587518	0.371363	0.965237	0.296479
1	1_1	ALGA0000672	LB	0.419842	0.436075	0.988718	0.269159	0.120081	0.216763
1	1_1	ALGA0000672	TB	0.616021	0.708928	0.804642	0.512866	0.729489	0.29991
1	1_1	ALGA0000674	LW	0.57554	0.399731	0.55018	0.0632151	0.953508	0.680072
1	1_1	ALGA0000674	TW	0.792371	0.57615	0.197707	0.0045139	0.788048	0.978895
1	1_1	ALGA0000674	LB	0.509545	0.472274	0.190788	0.0147575	0.507792	0.122559
1	1_1	ALGA0000674	TB	0.577514	0.453367	0.428319	0.0044139	0.874376	0.393783
1	1_1	ALGA0000681	LW	0.574405	0.453352	0.766409	0.388953	0.363882	0.965237
1	1_1	ALGA0000681	TW	0.17596	0.958591	0.182102	0.503569	0.831479	0.798187
1	1_1	ALGA0000681	LB	0.910994	0.769627	0.101994	0.342527	0.537163	0.869491
1	1_1	ALGA0000681	TB	0.958566	0.806056	0.13547	0.97124	0.845857	0.728622
1	1_1	ALGA0000684	LW	0.0576422	0.79252	0.928341	0.384889	0.472733	0.660237
1	1_1	ALGA0000684	TW	0.0792818	0.669678	0.66646	0.53065	0.335253	0.806366
1	1_1	ALGA0000684	LB	0.264723	0.984046	0.255986	0.2564	0.69075	0.884787
1	1_1	ALGA0000684	TB	0.154525	0.927422	0.0381644	0.943632	0.591989	0.797568
1	1_1	ALGA0000689	LW	0.726981	0.487444	0.418109	0.22011	0.716307	0.524446
1	1_1	ALGA0000689	TW	0.27668	0.199283	0.217725	0.275919	0.540315	0.615872
1	1_1	ALGA0000689	LB	0.977439	0.167447	0.141862	0.147838	0.924425	0.781144
1	1_1	ALGA0000689	TB	0.660491	0.394833	0.0464366	0.190368	0.876893	0.515683
1	1_1	ASGA0000687	LW	0.902595	0.568697	0.369998	0.351634	0.470296	0.41748
1	1_1	ASGA0000687	TW	0.909989	0.39537	0.163339	0.939827	0.649737	0.584075
1	1_1	ASGA0000687	LB	0.554878	0.525431	0.971243	0.0889832	0.834985	0.173333
1	1_1	ASGA0000687	TB	0.296144	0.581339	0.818629	0.087621	0.105285	0.226325
1	1_1	ASGA0000696	LW	0.551813		0.769638	0.227295	0.210587	0.441016
1	1_1	ASGA0000696	TW	0.734294		0.672509	0.561059	0.20093	0.779373
1	1_1	ASGA0000696	LB	0.289244	0.365759	0.163141	0.232905	0.579684	0.167414
1	1_1	ASGA0000696	TB	0.222183	0.699641	0.591453	0.461859	0.594839	0.241991
1	1_1	ASGA0000699	LW	0.422459	0.474586	0.879286	0.364862		0.216844
1	1_1	ASGA0000699	TW	0.692925	0.455619	0.690696	0.368832		0.478451
1	1_1	ASGA0000699	LB	0.242401	0.885343	0.720876	0.0590031	0.0338843	0.191574
1	1_1	ASGA0000699	TB	0.0960519	0.812637	0.910287	0.146789	0.0437342	0.29623
1	1_1	ASGA0000707	LW	0.500004	0.430335	0.903896	0.0161935	0.992022	0.0985852
1	1_1	ASGA0000707	TW	0.475155	0.60881	0.819076	0.0011651	0.642469	0.429151
1	1_1	ASGA0000707	LB	0.074392	0.986183	0.81846	0.066713	0.358658	0.561602
1	1_1	ASGA0000707	TB	0.206303	0.392366	0.734789	0.0246682	0.959336	0.669259
1	1_1	ASGA0000724	LW	0.138649	0.882974	0.841403	1	0.429964	0.452511
1	1_1	ASGA0000724	TW	0.0833827	0.920801	0.619515	0.501047	0.595589	0.960933
1	1_1	ASGA0000724	LB	0.338225	0.210246	0.10286	0.85393	0.743373	0.844853
1	1_1	ASGA0000724	TB	0.599144	0.2713	0.223486	0.519332	0.447146	0.890949
1	1_1	ASGA0000735	LW	0.640946	0.67216	0.37051	0.629735	0.552044	0.521696
1	1_1	ASGA0000735	TW	0.469561	0.473955	0.510777	0.296323	0.527997	0.510653
1	1_1	ASGA0000735	LB	0.160285	0.95351	0.0462544	0.831099	0.517777	0.590766
1	1_1	ASGA0000735	TB	0.335531	1	0.144914	0.745345	0.316122	0.699036
1	1_1	BGIS0001145	LW	0.461337	0.884052	0.760711	0.786055	0.297588	0.496266
1	1_1	BGIS0001145	TW	0.123604	0.758848	0.379433	0.741553	0.354423	0.97237
1	1_1	BGIS0001145	LB	0.752112	0.326382	0.358282	0.68498	0.576612	0.818951
1	1_1	BGIS0001145	TB	0.719415	0.373722	0.773045	0.659634	0.338406	0.924007
1	1_1	DBWU0000005	LW	0.402589	0.840624	0.541124	0.702142	0.794006	0.890382
1	1_1	DBWU0000005	TW	0.104659	0.867914	0.832866	0.423997	0.751507	0.479767
1	1_1	DBWU0000005	LB	0.386702	0.207883	0.382461	0.978894	0.444681	0.474104
1	1_1	DBWU0000005	TB	0.154285	0.734789	0.246732	0.636943	0.761793	0.798775
1	1_1	H3GA0000571	LW	0.630348	0.619298	0.481603	0.781713
1	1_1	H3GA0000571	TW	0.887899	0.912834	0.162829	0.621821
1	1_1	H3GA0000571	LB	0.0614355	0.827858	0.23764	0.935255
1	1_1	H3GA0000571	TB	0.0572466	0.928299	0.150755	0.90061
1	1_1	H3GA0000572	LW	0.962617	0.676928	0.197003	0.594547	0.836693	0.634264
1	1_1	H3GA0000572	TW	0.819414	0.801505	0.399435	0.174256	0.914243	0.233576
1	1_1	H3GA0000572	LB	0.472659	0.71386	0.347553	0.647422	0.68507	0.151425
1	1_1	H3GA0000572	TB	0.509593	0.820332	0.577575	0.2463	0.852236	0.0503259
1	1_1	H3GA0000600	LW	0.668911	0.538233	0.10751	0.26564	0.604606	0.541343
1	1_1	H3GA0000600	TW	0.872732	0.514455	0.0750171	0.326665	0.817949	0.745598
1	1_1	H3GA0000600	LB	0.0470875	0.585154	0.899047	0.907509	0.545945	0.6696
1	1_1	H3GA0000600	TB	0.0182552	0.417815	0.763709	0.64492	0.59051	0.478799
1	1_1	INRA0000377	LW	0.117277	0.448689	0.509121	0.628414	0.0448275	0.0931994
1	1_1	INRA0000377	TW	0.121127	0.530996	0.587457	0.718683	0.196697	0.226887
1	1_1	INRA0000377	LB	0.0854464	0.322723	0.326459	0.332061	0.565401	0.133444
1	1_1	INRA0000377	TB	0.180586	0.397985	0.163726	0.586056	0.58329	0.144049
1	1_1	INRA0000412	LW	0.0543755	0.539916	0.883786	0.151602	0.366033	0.618053
1	1_1	INRA0000412	TW	0.0333131	0.747879	0.2231	0.24636	0.436098	0.409146
1	1_1	INRA0000412	LB	0.634648	0.554144	0.129813	0.251099	0.263092	0.750771
1	1_1	INRA0000412	TB	0.435134	0.659341	0.0720649	0.952159	0.271841	0.666292
1	1_1	M1GA0000626	LW	0.367041	0.63391	0.0720693	0.86998	0.59312	0.369961
1	1_1	M1GA0000626	TW	0.26766	0.458825	0.153778	0.78934	0.767672	0.782546
1	1_1	M1GA0000626	LB	0.719103	0.822052	0.194968	0.980459	0.654667	0.953505
1	1_1	M1GA0000626	TB	0.773443	0.872656	0.157403	0.538392	0.953505	0.984044
1	1_1	MARC0000408	LW	0.803356	0.745641	0.683316	0.0427396	0.458784	0.966164
1	1_1	MARC0000408	TW	0.560272	0.806959	0.820609	0.0041859	0.562803	0.33648
1	1_1	MARC0000408	LB	0.508719	0.546104	0.438885	0.0363067	0.458039	0.107261
1	1_1	MARC0000408	TB	0.44007	0.298767	0.828037	0.0168436	0.729163	0.264085
1	1_1	MARC0027776	LW	0.301781		0.288091	0.0944788	0.774371	0.518972
1	1_1	MARC0027776	TW	0.0825918		0.0870547	0.0159496	0.344226	0.424468
1	1_1	MARC0027776	LB	0.984046		0.538925	0.0546077	0.680937	0.206395
1	1_1	MARC0027776	TB	0.816107		0.396797	0.0507447	0.302396	0.203745
1	1_1	MARC0089489	LW	0.890454	0.478355	0.582705	0.327798	0.502944	0.651088
1	1_1	MARC0089489	TW	0.882982	0.434884	0.234791	0.235148	0.586658	0.937755
1	1_1	MARC0089489	LB	0.984046	0.032832	0.39231	0.624091	0.590189	0.245599
1	1_1	MARC0089489	TB	0.832955	0.190309	0.207382	0.864788	0.479589	0.320567
1	1_2	ALGA0001621	LW	0.472705	0.277377	0.887621	0.147184	0.920753	0.107858
1	1_2	ALGA0001621	TW	0.879548	0.139142	0.371582	0.0630027	0.51837	0.0633536
1	1_2	ALGA0001621	LB	0.338911	0.382431	0.220317	0.251999	0.265775	0.727326
1	1_2	ALGA0001621	TB	0.624635	0.358794	0.289865	0.100705	0.489919	0.94593
1	1_2	ALGA0001635	LW	0.671555	0.234891	0.245707	0.287896	0.800158	0.587228
1	1_2	ALGA0001635	TW	0.185779	0.0532465	0.594765	0.550084	0.20231	0.353555
1	1_2	ALGA0001635	LB	0.951504	0.619052	0.661897	0.903832	0.0933613	0.963452
1	1_2	ALGA0001635	TB	0.686829	0.258966	0.61323	0.815923	0.03257	0.348565
1	1_2	ALGA0001639	LW	0.206828	0.671037	0.399564	0.595328	0.406002	0.205091
1	1_2	ALGA0001639	TW	0.949608	0.910339	0.173266	0.488149	0.308726	0.196719
1	1_2	ALGA0001639	LB	0.575559	0.511496	0.0930105	0.557737	0.440426	0.28137
1	1_2	ALGA0001639	TB	0.903513	0.811008	0.263913	0.886157	0.484507	0.509928
1	1_2	ALGA0001649	LW	0.428579	0.914296	0.500907	0.258385		0.240376
1	1_2	ALGA0001649	TW	0.826183	0.883783	0.942008	0.180003		0.203717
1	1_2	ALGA0001649	LB	0.5413	0.632037	0.703412	0.874875		0.444876
1	1_2	ALGA0001649	TB	0.368555	0.4924	0.951504	0.759294		0.400797
1	1_2	ALGA0001660	LW	0.224561	0.615927	0.137918	0.968098	0.410594	0.491975
1	1_2	ALGA0001660	TW	0.984055	0.662698	0.0744849	0.525986	0.284198	0.426949
1	1_2	ALGA0001660	LB	0.467136	0.600403	0.469588	0.183219	0.186818	0.869252
1	1_2	ALGA0001660	TB	0.873395	0.824315	0.943637	0.797869	0.243459	0.62612
1	1_2	ASGA0001565	LW	0.629914	0.536418	0.283644	0.112871	0.49372	0.561696
1	1_2	ASGA0001565	TW	0.629842	0.173282	0.992027	0.117043	0.870462	0.894176
1	1_2	ASGA0001565	LB	0.356354	0.930087	0.271183	0.329962	0.408644	0.622651
1	1_2	ASGA0001565	TB	0.414187	0.429388	0.71234	0.343408	0.542226	0.781006
1	1_2	ASGA0001574	LW	0.41909	0.406661	0.71537	0.425019	0.33121	0.0237836
1	1_2	ASGA0001574	TW	0.968117	0.208677	0.324063	0.275222	0.916105	0.0184037
1	1_2	ASGA0001574	LB	0.424231	0.482076	0.181158	0.473074	0.0958788	0.916855
1	1_2	ASGA0001574	TB	0.698111	0.468191	0.247246	0.236989	0.201388	0.974775
1	1_2	ASGA0001581	LW	0.51612			0.139654		0.941972
1	1_2	ASGA0001581	TW	0.182987			0.180755		0.687461
1	1_2	ASGA0001581	LB	0.798794			0.406457		0.522976
1	1_2	ASGA0001581	TB	0.719311			0.318444		0.918003
1	1_2	ASGA0001584	LW	0.466741			0.638184
1	1_2	ASGA0001584	TW	0.630289			0.907515
1	1_2	ASGA0001584	LB	0.818799		0.0375003	0.765086
1	1_2	ASGA0001584	TB	0.57229		0.0664255	0.958562
1	1_2	ASGA0001599	LW	0.562581	0.744593	0.947754	0.959339	0.850365	0.0331873
1	1_2	ASGA0001599	TW	0.724738	0.19944	0.879806	0.963454	0.834998	0.0829138
1	1_2	ASGA0001599	LB	0.367903	0.621329	0.572892	0.169851	0.726573	0.0620411
1	1_2	ASGA0001599	TB	0.454492	0.33501	0.739847	0.0670705	0.833494	0.207721
1	1_2	DRGA0000219	LW	0.612516		0.143195	0.55042	0.430744	0.228399
1	1_2	DRGA0000219	TW	0.513908		0.261164	0.665814	0.331665	0.244753
1	1_2	DRGA0000219	LB	0.381032	0.0825106	0.0443576	0.0386202	0.684076	0.09962
1	1_2	DRGA0000219	TB	0.525174	0.116958	0.0091143	0.0225071	0.776637	0.151138
1	1_2	DRGA0000221	LW	0.858576	0.791792	0.253237	0.123397	0.864798	0.0135569
1	1_2	DRGA0000221	TW	0.777475	0.814892	0.107725	0.0755584	0.546204	0.0046273
1	1_2	DRGA0000221	LB	0.463418	0.0844101	0.158495	0.295391	0.202644	0.735097
1	1_2	DRGA0000221	TB	0.567161	0.146442	0.287328	0.111716	0.367943	0.680136
1	1_2	H3GA0001098	LW	0.51612			0.20001		0.342453
1	1_2	H3GA0001098	TW	0.182987			0.189962		0.755618
1	1_2	H3GA0001098	LB	0.74537		0.882106	0.242749		0.334252
1	1_2	H3GA0001098	TB	0.579482		0.624707	0.113644		0.96093
1	1_2	MARC0004884	LW	0.294099	0.570487	0.161507	0.390801	0.272133	0.255959
1	1_2	MARC0004884	TW	0.554117	0.485663	0.265367	0.892407	0.441092	0.158158
1	1_2	MARC0004884	LB	0.307885	0.801848	0.458305	0.546937	0.88895	0.587765
1	1_2	MARC0004884	TB	0.438465	0.844468	0.612121	0.810182	0.563758	0.172685
1	1_3	ALGA0006172	LW	0.671301	0.260232	0.27909	0.027026	0.464984	0.651726
1	1_3	ALGA0006172	TW	0.370306	0.627719	0.268766	0.0046599	0.164691	0.763324
1	1_3	ALGA0006172	LB	0.671173	0.401837	0.0323473	0.0183066	0.562882	0.480337
1	1_3	ALGA0006172	TB	1	0.95706	0.0754567	0.0048215	0.814925	0.641748
1	1_3	ALGA0006191	LW	0.924475			0.556517
1	1_3	ALGA0006191	TW	0.922006			0.409111
1	1_3	ALGA0006191	LB	0.986183		0.624707	0.875126		0.424197
1	1_3	ALGA0006191	TB	0.880784		0.301623	0.838013		0.615911
1	1_3	ALGA0006195	LW	0.903897	0.567989	0.839853	0.0601505	0.393874	0.720243
1	1_3	ALGA0006195	TW	0.380597	0.806015	0.338821	0.0049783	0.191998	0.753674
1	1_3	ALGA0006195	LB	0.905161	0.489113	0.0989991	0.0126446	0.96093	0.685161
1	1_3	ALGA0006195	TB	0.696779	0.648481	0.125218	0.003331	0.952827	0.79296
1	1_3	ALGA0006200	LW	0.0102127		0.129328	0.319533	0.412637	0.136345
1	1_3	ALGA0006200	TW	0.151995		0.499762	0.535654	0.71993	0.0517879
1	1_3	ALGA0006200	LB	0.616301	0.216475	0.674282	0.361697	0.713324	0.83725
1	1_3	ALGA0006200	TB	0.509252	0.382773	0.72298	0.714851	0.756211	0.862954
1	1_3	ALGA0006219	LW	0.103857	0.0488166	0.827783	0.0295655	0.724352	0.620109
1	1_3	ALGA0006219	TW	0.0725961	0.0862477	0.679313	0.0021037	0.913146	0.520533
1	1_3	ALGA0006219	LB	0.455949	0.302397	0.864571	0.0234827	0.680581	0.48047
1	1_3	ALGA0006219	TB	0.451527	0.205569	0.874887	0.0120778	0.618447	0.329327
1	1_3	ALGA0006239	LW	0.241949		0.115076
1	1_3	ALGA0006239	TW	0.565455		0.349503
1	1_3	ALGA0006239	LB	0.270552	0.0926935	0.0546448
1	1_3	ALGA0006239	TB	0.270729	0.208372	0.052214
1	1_3	ALGA0006244	LW	0.203645	0.51568	0.0229928	0.839175
1	1_3	ALGA0006244	TW	0.405387	0.69153	0.581186	0.350196
1	1_3	ALGA0006244	LB	0.0477499	0.393664	0.0796976	0.575209
1	1_3	ALGA0006244	TB	0.0592425	0.51984	0.255286	0.817599
1	1_3	ASGA0004699	LW	0.291216	0.489684	0.169974	0.0118461	0.627169	0.809874
1	1_3	ASGA0004699	TW	0.982174	0.961779	0.315529	0.0017547	0.112729	0.813947
1	1_3	ASGA0004699	LB	0.654058	0.547264	0.516434	0.0078011	0.668238	0.35005
1	1_3	ASGA0004699	TB	0.731698	0.890671	0.597564	0.0019017	0.869731	0.528319
1	1_3	ASGA0004701	LW	0.973561	0.376811	0.165109	0.0090106	0.835749	0.472432
1	1_3	ASGA0004701	TW	0.564627	0.242093	0.918444	0.0056163	0.665393	0.76975
1	1_3	ASGA0004701	LB	0.652612	0.199119	0.665232	0.0046027	0.401164	0.259897
1	1_3	ASGA0004701	TB	0.739279	0.624997	0.492811	0.0056219	0.726359	0.794138
1	1_3	ASGA0004702	LW	0.0116991		0.215008	0.306914	0.412463	0.373554
1	1_3	ASGA0004702	TW	0.175076		0.749754	0.407706	0.681229	0.469064
1	1_3	ASGA0004702	LB	0.907177	0.0457891	0.105703	0.780455	0.57649	0.611045
1	1_3	ASGA0004702	TB	0.960129	0.153617	0.0538612	0.827663	0.63059	0.638763
1	1_3	ASGA0004715	LW	0.377612	0.490665	0.371308	0.967116	0.111537	0.529607
1	1_3	ASGA0004715	TW	0.931499	0.595026	0.216298	0.621965	0.313273	0.642624
1	1_3	ASGA0004715	LB	0.37324	0.591259	0.685102	0.892692	0.980459	0.696749
1	1_3	ASGA0004715	TB	0.253238	0.427291	0.966164	0.497293	0.61312	0.751368
1	1_3	ASGA0004723	LW	0.845357	0.548734	0.605008	0.787619	0.0979894	0.45468
1	1_3	ASGA0004723	TW	0.46765	0.572338	0.31132	0.713651	0.284762	0.619114
1	1_3	ASGA0004723	LB	1	0.498706	0.555844	0.984044	0.955602	0.75855
1	1_3	ASGA0004723	TB	0.764598	0.296653	0.406767	0.463393	0.544846	0.892692
1	1_3	ASGA0004729	LW	0.0339568		0.0908482	0.169634	0.117844	0.245783
1	1_3	ASGA0004729	TW	0.143887		0.655727	0.0830116	0.0720775	0.599334
1	1_3	ASGA0004729	LB	0.814611	0.000265	0.986183	0.349582	0.566934	0.776907
1	1_3	ASGA0004729	TB	0.872165	0.0006851	0.676287	0.19514	0.321993	0.67766
1	1_3	ASGA0004731	LW	0.0481786		0.393027	0.781714		0.461289
1	1_3	ASGA0004731	TW	0.150363		0.850042	0.629221		0.100607
1	1_3	ASGA0004731	LB	0.146893	0.140014	0.418844	0.86025		0.111497
1	1_3	ASGA0004731	TB	0.154835	0.0621688	0.834067	0.736437		0.649314
1	1_3	DRGA0001552	LW	0.165983	0.0850747	0.818397	0.555606	0.111052	0.787191
1	1_3	DRGA0001552	TW	0.381698	0.0481984	0.948365	0.856303	0.130218	0.813125
1	1_3	DRGA0001552	LB	0.495443	0.842094	0.892118	0.629264	0.499166	0.858257
1	1_3	DRGA0001552	TB	0.44847	0.875388	0.637812	0.976069	0.739595	0.925267
1	1_3	H3GA0002860	LW	0.413655	0.759338	0.134716	0.0213398	0.485269	0.480471
1	1_3	H3GA0002860	TW	0.448015	0.663942	0.0784076	0.0025463	0.149835	0.631212
1	1_3	H3GA0002860	LB	0.782412	0.253184	0.394474	0.00689	0.462977	0.858038
1	1_3	H3GA0002860	TB	0.668186	0.528785	0.326205	0.0009897	0.666714	0.825353
1	1_3	H3GA0002865	LW	0.951532	0.681883	0.259788	0.107438	0.449644	0.73803
1	1_3	H3GA0002865	TW	0.353976	0.57872	0.0916647	0.0158036	0.156408	0.855871
1	1_3	H3GA0002865	LB	0.635172	0.0560388	0.340367	0.008766	0.745345	0.667306
1	1_3	H3GA0002865	TB	0.523895	0.236952	0.289693	0.0022824	0.663943	0.633263
1	1_3	H3GA0002876	LW	0.401301	0.931499	0.294772	0.046786	0.519627	0.914243
1	1_3	H3GA0002876	TW	0.463234	0.539789	0.4454	0.0070815	0.257848	0.992022
1	1_3	H3GA0002876	LB	0.969111	0.212572	0.0356205	0.0058516	0.84932	0.36892
1	1_3	H3GA0002876	TB	0.788482	0.746187	0.0506452	0.0009901	0.982161	0.40257
1	1_3	H3GA0002880	LW	0.665703	0.916533	0.208344	0.026812	0.639937	0.837643
1	1_3	H3GA0002880	TW	0.216428	0.426057	0.266734	0.0036511	0.291141	0.804794
1	1_3	H3GA0002880	LB	0.792247	0.260859	0.0509817	0.0199129	0.220136	0.320813
1	1_3	H3GA0002880	TB	0.670402	0.66198	0.0532587	0.0031151	0.469314	0.438781
1	1_3	H3GA0002892	LW	0.0389665		0.149933	0.915355		0.409214
1	1_3	H3GA0002892	TW	0.421799		0.354412	0.957059		0.0774393
1	1_3	H3GA0002892	LB	0.17856		0.578928	0.102587		0.722425
1	1_3	H3GA0002892	TB	0.112563		0.603405	0.504331		0.633786
1	1_3	H3GA0002894	LW	0.211614	0.810964	0.0631991	0.122509	0.268589	0.197568
1	1_3	H3GA0002894	TW	0.169418	0.928785	0.293355	0.0576491	0.12121	0.594938
1	1_3	H3GA0002894	LB	0.229371	0.499271	0.950854	0.307146	0.517877	0.901886
1	1_3	H3GA0002894	TB	0.0878513	0.186702	0.900619	0.178928	0.409194	0.878947
1	1_3	INRA0004393	LW	0.0900625		0.123636	0.335669	0.392964	0.42072
1	1_3	INRA0004393	TW	0.0830066		0.90723	0.781437	0.831844	0.299352
1	1_3	INRA0004393	LB	0.312034	0.431165	0.982163	0.641286	0.603564	0.635059
1	1_3	INRA0004393	TB	0.158464	0.441338	0.708232	0.720013	0.736102	0.711605
1	1_3	INRA0004415	LW	0.0297328		0.0732213	0.31929	0.406478	0.133945
1	1_3	INRA0004415	TW	0.449904		0.476099	0.534965	0.724564	0.0500304
1	1_3	INRA0004415	LB	0.723509	0.0598105	0.454935	0.515932	0.649948	0.564578
1	1_3	INRA0004415	TB	0.800315	0.186255	0.540973	0.806668	0.720849	1
1	1_3	INRA0004425	LW	0.0571599		0.0502165	0.319533	0.412637	0.136345
1	1_3	INRA0004425	TW	0.439959		0.36603	0.535654	0.71993	0.0517879
1	1_3	INRA0004425	LB	0.626886	0.0664696	0.306102	0.341107	0.718142	0.867353
1	1_3	INRA0004425	TB	0.677692	0.199857	0.337622	0.669685	0.765597	0.814759
1	1_3	INRA0004428	LW	0.0305972		0.0372675	0.3084	0.413264	0.17246
1	1_3	INRA0004428	TW	0.4503		0.378308	0.677069	0.77304	0.0485445
1	1_3	INRA0004428	LB	0.701954	0.0613117	0.599805	0.360345	0.701828	0.952159
1	1_3	INRA0004428	TB	0.783247	0.187874	0.561706	0.531551	0.804936	0.554263
1	1_3	INRA0004458	LW	0.229978		0.11085
1	1_3	INRA0004458	TW	0.537752		0.355579
1	1_3	INRA0004458	LB	0.298991	0.0826725	0.0430846
1	1_3	INRA0004458	TB	0.286535	0.192766	0.0462562
1	1_3	INRA0004459	LW	0.245482		0.565443
1	1_3	INRA0004459	TW	0.5648		0.90757
1	1_3	INRA0004459	LB	0.272669	0.0909069	0.134418
1	1_3	INRA0004459	TB	0.274448	0.203528	0.0999551
1	1_3	MARC0010520	LW	0.106415	0.749287	0.147699	0.787476		0.421149
1	1_3	MARC0010520	TW	0.0507541	0.560687	0.596924	0.599135		0.0941667
1	1_3	MARC0010520	LB	0.0279902	0.669805	0.950213	0.161951		0.46995
1	1_3	MARC0010520	TB	0.0067775	0.73006	0.938268	0.412408		0.942518
2	2_1	ALGA0011347	LW				0.960933
2	2_1	ALGA0011347	TW				0.941429
2	2_1	ALGA0011347	LB				0.498369
2	2_1	ALGA0011347	TB				0.452862
2	2_1	ALGA0112481	LW	0.298218	0.980472	0.0868922	0.317639	1	0.41533
2	2_1	ALGA0112481	TW	0.110806	0.697916	0.0199542	0.217706	0.978895	0.240479
2	2_1	ALGA0112481	LB	0.501721	0.69078	0.627615	0.608849	0.966161	0.932853
2	2_1	ALGA0112481	TB	0.55318	0.801233	0.57684	0.347089	0.752449	0.505193
2	2_1	ASGA0008398	LW	0.502931	0.861015	0.483248	0.607449	0.430077	0.849951
2	2_1	ASGA0008398	TW	0.862141	0.969129	0.355547	0.637881	0.57216	0.606905
2	2_1	ASGA0008398	LB	0.360886	0.796836	0.958566	0.631775	0.911341	0.135871
2	2_1	ASGA0008398	TB	0.496698	0.803862	0.374449	0.916855	0.552007	0.374401
2	2_1	ASGA0083718	LW	0.784357	0.28314	0.450146	0.737918		0.616433
2	2_1	ASGA0083718	TW	0.587581	0.309993	0.127419	0.453754		0.870945
2	2_1	ASGA0083718	LB	0.175768	0.588317	0.341457	0.536733		0.522213
2	2_1	ASGA0083718	TB	0.749011	0.926125	0.334492	0.758055		0.639144
2	2_1	ASGA0084177	LW	0.678253	1	0.406042	0.166708	0.189982	0.299738
2	2_1	ASGA0084177	TW	0.980472	0.617264	0.429425	0.204464	0.188405	0.579845
2	2_1	ASGA0084177	LB	0.103319	0.412308	0.22329	0.805879	0.318227	0.342659
2	2_1	ASGA0084177	TB	0.0677791	0.569356	0.193453	0.799383	0.284461	0.085647
2	2_1	ASGA0088012	LW	0.661221	0.0790587	0.388961	0.958565	0.616785	0.613708
2	2_1	ASGA0088012	TW	0.66238	0.0471172	0.673987	0.526757	0.737468	0.553453
2	2_1	ASGA0088012	LB	0.211872	0.5975	0.0528879	0.196127	0.601491	0.256566
2	2_1	ASGA0088012	TB	0.763964	0.705271	0.0345961	0.0749392	0.783507	0.13416
2	2_1	ASGA0088147	LW	0.761599	0.846777	0.151714	0.0753419	0.895975	1
2	2_1	ASGA0088147	TW	0.676429	0.865815	0.162063	0.0797535	0.896581	0.59377
2	2_1	ASGA0088147	LB	0.257768	0.46164	0.692177	0.338963	0.522926	0.677661
2	2_1	ASGA0088147	TB	0.0531535	0.347863	0.713559	0.583479	0.785615	0.709999
2	2_1	ASGA0090419	LW	0.233834	0.15223	0.570727	0.557316		0.789628
2	2_1	ASGA0090419	TW	0.780199	0.518931	0.470241	0.495337		0.230231
2	2_1	ASGA0090419	LB	0.956327	0.97237	0.988718	0.283348		0.374824
2	2_1	ASGA0090419	TB	0.560144	0.40827	0.84587	0.481263		0.215772
2	2_1	ASGA0091920	LW	0.478983	0.978908	0.420969	0.0564644	0.72287	0.522357
2	2_1	ASGA0091920	TW	0.16031	0.623807	0.2182	0.0787889	0.721711	0.44771
2	2_1	ASGA0091920	LB	0.926125	0.757956	0.72703	0.850771	0.100738	0.441081
2	2_1	ASGA0091920	TB	0.610124	0.322921	0.38362	0.751249	0.309079	0.542934
2	2_1	ASGA0094493	LW	0.921608	0.648578	0.581036	0.248021	0.560771	0.788191
2	2_1	ASGA0094493	TW	0.538591	0.285851	0.626289	0.136809	0.66818	0.961755
2	2_1	ASGA0094493	LB	0.737925	0.728866	0.899988	0.169153	0.84208	0.921148
2	2_1	ASGA0094493	TB	0.52703	0.876651	0.885344	0.46957	0.556652	0.262106
2	2_1	ASGA0098481	LW	0.505053	0.621954	0.982174	0.613432	0.546152	0.882638
2	2_1	ASGA0098481	TW	0.121975	0.388901	0.84044	0.368571	0.535764	0.949578
2	2_1	ASGA0098481	LB	0.174556	0.895074	0.931459	0.104951	0.720745	0.7105
2	2_1	ASGA0098481	TB	0.914985	0.733682	0.735347	0.307892	0.954892	0.692423
2	2_1	ASGA0099540	LW	0.665704	0.38125	0.238907	0.698772		0.699155
2	2_1	ASGA0099540	TW	0.479952	0.210351	0.19511	0.312418		0.925696
2	2_1	ASGA0099540	LB	0.482829	0.666495	0.357913	0.821517		0.968095
2	2_1	ASGA0099540	TB	0.631294	0.552055	0.126656	0.710199		0.725716
2	2_1	ASGA0103371	LW	0.776259	1	0.507342	0.687286
2	2_1	ASGA0103371	TW	0.264232	0.358415	0.402685	0.612331
2	2_1	ASGA0103371	LB	0.287878	0.80732	0.15418	0.364228
2	2_1	ASGA0103371	TB	0.669378	1	0.0316661	0.734767
2	2_1	CAMB0000291	LW	0.551204	0.0734199	0.46416	0.906162	0.380709	0.162066
2	2_1	CAMB0000291	TW	0.689971	0.0456483	0.60095	0.493124	0.264951	0.403537
2	2_1	CAMB0000291	LB	0.305669	0.390661	0.467054	0.382232	0.0352893	0.237356
2	2_1	CAMB0000291	TB	0.778968	0.632409	0.23741	0.111076	0.0401079	0.0659792
2	2_1	DBWU0000553	LW	0.205659		0.78647	0.63986		0.115171
2	2_1	DBWU0000553	TW	0.214949		0.715158	0.67892		0.264717
2	2_1	DBWU0000553	LB	0.13187		0.486223	0.540168		0.36046
2	2_1	DBWU0000553	TB	0.106571		0.124267	0.176141		0.445579
2	2_1	DBWU0000554	LW	0.585242		0.475063	0.149245		0.183545
2	2_1	DBWU0000554	TW	0.755406		0.917291	0.631214		0.362082
2	2_1	DBWU0000554	LB	0.265779		0.809075	0.749224		0.396463
2	2_1	DBWU0000554	TB	0.174354		0.504771	0.187922		0.685343
2	2_1	DBWU0000561	LW	0.180447		0.742982	0.905492		0.101505
2	2_1	DBWU0000561	TW	0.268436		0.617192	0.496081		0.244231
2	2_1	DBWU0000561	LB	0.14863		0.298031	0.444253		0.412583
2	2_1	DBWU0000561	TB	0.128505		0.0570001	0.103578		0.596275
2	2_1	H3GA0005490	LW	0.40948		0.960956	0.457435
2	2_1	H3GA0005490	TW	0.646672		0.299443	0.0698433
2	2_1	H3GA0005490	LB	0.341271		0.928299	0.595882
2	2_1	H3GA0005490	TB	0.935752		0.864801	0.20991
2	2_1	H3GA0053629	LW	0.784357	0.28314	0.450146	0.886441		0.806998
2	2_1	H3GA0053629	TW	0.587581	0.309993	0.127419	0.354227		1
2	2_1	H3GA0053629	LB	0.194424	0.659176	0.602801	0.657261		0.706717
2	2_1	H3GA0053629	TB	0.703411	0.913147	0.445252	0.65499		0.775828
2	2_1	INRA0008077	LW	0.27528		0.821809	0.78648
2	2_1	INRA0008077	TW	0.121994		0.940391	0.764721
2	2_1	INRA0008077	LB	0.35321		0.795194	0.161812
2	2_1	INRA0008077	TB	0.0766471		0.865032	0.176815
2	2_1	INRA0008082	LW	0.992027	0.854458	0.957086	0.54836	0.986183	0.919566
2	2_1	INRA0008082	TW	0.597579	0.753713	0.912116	0.520887	0.768449	0.513105
2	2_1	INRA0008082	LB	0.389185	0.345163	0.889813	0.914977	0.368268	0.130163
2	2_1	INRA0008082	TB	0.816776	0.295947	0.59049	0.779493	0.638916	0.380461
2	2_1	INRA0059396	LW	0.028211	0.0346976	0.399468	0.326664		0.451392
2	2_1	INRA0059396	TW	0.17734		0.37917	0.303832		0.200861
2	2_1	INRA0059396	LB	0.552843	0.541082	0.919961	0.143747		0.341454
2	2_1	INRA0059396	TB	0.754892	0.200102	0.674108	0.262749		0.239905
2	2_1	INRA0060703	LW	0.589298	0.816886	0.894836	0.634788	0.503039	0.191906
2	2_1	INRA0060703	TW	0.899732	0.768208	0.906219	0.513203	0.190854	0.672975
2	2_1	INRA0060703	LB	0.64048	0.482697	0.555902	0.841101	0.595295	0.581855
2	2_1	INRA0060703	TB	0.610124	0.364416	0.220396	0.982161	0.309359	0.274998
2	2_1	INRA0061709	LW	0.703999	0.307678	0.782552	0.573548	0.453676	0.108915
2	2_1	INRA0061709	TW	0.868394	0.575322	0.878003	0.56585	0.585208	0.125776
2	2_1	INRA0061709	LB	0.992023	0.974777	0.895374	0.456737	0.742452	0.290723
2	2_1	INRA0061709	TB	0.796538	0.885344	0.925274	0.907509	0.841492	0.205971
2	2_1	M1GA0025589	LW	0.836797	0.101802	0.737754	0.707336	0.451119	0.203182
2	2_1	M1GA0025589	TW	0.79194	0.0771937	0.777476	0.506826	0.231947	0.325944
2	2_1	M1GA0025589	LB	0.335095	0.666076	0.0109209	0.302626	0.0451506	0.236169
2	2_1	M1GA0025589	TB	0.95351	0.824667	0.0156508	0.167798	0.0401098	0.0811544
2	2_1	MARC0066239	LW	0.895734	0.906553	0.368567	0.715077		0.540206
2	2_1	MARC0066239	TW	0.277343	0.10559	0.405316	0.783383		0.667755
2	2_1	MARC0066239	LB	0.149232	0.917243	0.493594	0.343085		0.0670657
2	2_1	MARC0066239	TB	0.600203	0.788625	0.110319	0.44367		0.0449703
2	2_1	MARC0066630	LW	0.29358	0.947151	0.530672	0.905826		0.232772
2	2_1	MARC0066630	TW	0.0454207	0.0658925	0.946555	0.878439		0.276445
2	2_1	MARC0066630	LB	0.433552	0.964335	0.88507	0.82325		0.115388
2	2_1	MARC0066630	TB	0.89329	0.984046	0.362815	0.627577		0.21504
2	2_1	MARC0095813	LW	0.658163	0.612303	0.603127	0.766512	0.201924	0.0598582
2	2_1	MARC0095813	TW	0.879286	0.903243	0.555974	0.835561	0.43156	0.0788439
2	2_1	MARC0095813	LB	0.763455	0.912064	0.986183	0.707311	0.704554	0.15378
2	2_1	MARC0095813	TB	0.929635	0.894177	0.943637	0.754018	0.972368	0.157053
2	2_1	MARC0113257	LW	0.169787		0.69042	0.602726		0.119225
2	2_1	MARC0113257	TW	0.18875		0.770941	0.81198		0.282671
2	2_1	MARC0113257	LB	0.148786		0.462087	0.661201		0.320371
2	2_1	MARC0113257	TB	0.123864		0.129101	0.213467		0.456574
2	2_1	MARC0113936	LW	0.74669	0.868386	0.651555	0.559671	0.467417	0.0581656
2	2_1	MARC0113936	TW	0.822848	0.583236	0.654679	0.742701	0.678478	0.0801848
2	2_1	MARC0113936	LB	0.960934	0.591645	0.935261	0.631182	0.87843	0.162597
2	2_1	MARC0113936	TB	0.7214	1	0.932389	0.740049	0.974775	0.170749
2	2_1	SIRI0001294	LW	0.390745	0.733966	0.302485	0.264679		0.111278
2	2_1	SIRI0001294	TW	0.038243	0.0907416	0.54067	0.582763		0.0865527
2	2_1	SIRI0001294	LB	0.263078	0.255268	0.53604	0.208424		0.716903
2	2_1	SIRI0001294	TB	0.920755	0.404496	0.737586	0.161695		0.935747
2	2_2	ALGA0012816	LW	1	0.844761	0.89306	0.33632		0.175872
2	2_2	ALGA0012816	TW	0.22062	0.664701	0.61917	0.848099		0.0791528
2	2_2	ALGA0012816	LB	0.882639	0.651335	0.0821207	0.160681	0.780317	0.429099
2	2_2	ALGA0012816	TB	0.113694	0.663309	0.254716	0.345106	0.113284	0.777313
2	2_2	ALGA0012826	LW	0.980472	0.578105	0.453168	0.772642	0.0821611	0.116051
2	2_2	ALGA0012826	TW	0.48223	0.752143	0.984055	0.274791	0.0582742	0.224812
2	2_2	ALGA0012826	LB	0.342498	0.30661	0.0544522	0.246493	0.0020615	0.0222958
2	2_2	ALGA0012826	TB	0.74607	0.390947	0.0843386	0.125595	0.0011911	0.0232162
2	2_2	ALGA0012830	LW	0.502272	0.338108	0.315622	0.156811	0.679186	0.0566143
2	2_2	ALGA0012830	TW	0.527365	0.735846	0.480957	0.913146	0.883981	0.106014
2	2_2	ALGA0012830	LB	0.941974	0.106459	0.254168	0.796069	0.504331	0.192136
2	2_2	ALGA0012830	TB	0.12008	0.115687	0.553125	0.371003	0.227902	0.208842
2	2_2	ALGA0012835	LW	0.717417	0.251151	0.579091	0.347918	0.216215	0.0336101
2	2_2	ALGA0012835	TW	0.658253	0.132947	0.273845	0.954197	0.234733	0.102651
2	2_2	ALGA0012835	LB	0.539141	0.550822	0.332478	0.869013	0.0309399	0.208798
2	2_2	ALGA0012835	TB	0.275194	0.728864	0.451486	0.624814	0.0685237	0.210986
2	2_2	ALGA0100322	LW	0.627716	0.388897	0.829399	0.734451	0.47454	0.695731
2	2_2	ALGA0100322	TW	0.364924	0.936285	0.591988	0.606227	0.699251	0.260933
2	2_2	ALGA0100322	LB	0.592677	0.84587	0.949579	0.708005	0.941424	0.0740416
2	2_2	ALGA0100322	TB	0.251161	0.54937	0.783807	0.532338	0.720117	0.132609
2	2_2	ASGA0009800	LW	0.593853	0.798008	0.86214	0.674884	0.0573378	0.197297
2	2_2	ASGA0009800	TW	0.738535	0.671641	0.898794	0.611698	0.0579779	0.0853881
2	2_2	ASGA0009800	LB	0.358025	0.879476	0.651972	0.40789	0.0567399	0.0045698
2	2_2	ASGA0009800	TB	0.819308	0.776118	0.805425	0.142693	0.0252875	0.0036347
2	2_2	ASGA0009803	LW	0.850456	0.429928	0.532191	0.892994	0.0714247	0.0933275
2	2_2	ASGA0009803	TW	0.260768	0.618597	0.931038	0.310906	0.0451075	0.150868
2	2_2	ASGA0009803	LB	0.668356	0.745719	0.257959	0.14749	0.0001388	0.0578787
2	2_2	ASGA0009803	TB	0.458224	0.986183	0.38607	0.103773	6.66e-05	0.0283165
2	2_2	ASGA0009814	LW	0.704572	0.782265	0.523007	0.601191	0.294275	0.926553
2	2_2	ASGA0009814	TW	0.395173	0.596719	0.85108	0.340428	0.389679	0.716204
2	2_2	ASGA0009814	LB	0.934774	0.0899448	0.181999	0.410917	0.480778	0.681204
2	2_2	ASGA0009814	TB	0.599409	0.0776393	0.839178	0.682278	0.400596	0.430319
2	2_2	ASGA0009823	LW	0.0703306	0.925317	0.772126	0.339765	0.970157	0.299127
2	2_2	ASGA0009823	TW	0.361946	0.653241	0.77815	0.252474	0.675494	0.264179
2	2_2	ASGA0009823	LB	0.752112	0.909238	0.713861	0.138383	0.11428	0.093775
2	2_2	ASGA0009823	TB	0.948336	0.910994	0.906838	0.521452	0.144093	0.66054
2	2_2	ASGA0009826	LW	0.544117	0.992027	0.652037	0.188578	0.253108	0.382913
2	2_2	ASGA0009826	TW	0.0885907	0.382603	0.127774	0.23384	0.303125	0.278235
2	2_2	ASGA0009826	LB	0.430721	0.88184	0.106259	0.0640831	0.23261	0.143775
2	2_2	ASGA0009826	TB	0.286091	0.27154	0.122769	0.148323	0.242026	0.0266149
2	2_2	ASGA0009833	LW	0.947152	0.487986	0.721467	0.524855	0.773306	0.681229
2	2_2	ASGA0009833	TW	0.0824258	0.965257	0.685935	0.695731	1	0.338735
2	2_2	ASGA0009833	LB	0.791517	0.928741	0.0993269	0.914606	0.230039	0.312135
2	2_2	ASGA0009833	TB	0.14108	0.611154	0.0402171	0.784347	0.935746	0.234586
2	2_2	DRGA0002877	LW	0.940924	0.770022	0.973561	0.747824	0.392026	0.295771
2	2_2	DRGA0002877	TW	0.149514	0.544113	0.474845	0.805264	0.426288	0.19324
2	2_2	DRGA0002877	LB	0.61553	0.70576	0.182243	0.841296	0.6537	0.201383
2	2_2	DRGA0002877	TB	0.144554	0.508331	0.832584	0.448722	0.520996	0.435743
2	2_2	H3GA0006444	LW	0.1688	0.201022	0.984055	0.213815	0.944773	0.857391
2	2_2	H3GA0006444	TW	0.887344	0.0587902	0.729471	0.260518	0.888394	0.965237
2	2_2	H3GA0006444	LB	0.603204	0.690688	0.597629	0.38911	0.1358	0.540006
2	2_2	H3GA0006444	TB	0.389025	0.458756	0.695832	0.726038	0.134012	0.702507
2	2_2	H3GA0006445	LW	0.160754	0.675545	1	0.22771	0.92874	0.438451
2	2_2	H3GA0006445	TW	0.641112	0.765899	0.688136	0.269332	0.679097	0.495199
2	2_2	H3GA0006445	LB	0.380388	0.530299	0.454337	0.278529	0.0457174	0.185057
2	2_2	H3GA0006445	TB	0.531502	0.37903	0.267934	0.692423	0.0227237	0.759916
2	2_2	INRA0008514	LW	0.771863			0.964334		0.717337
2	2_2	INRA0008514	TW	0.515445			0.301265		0.517169
2	2_2	INRA0008514	LB	0.114905	0.306773	0.112748	0.417886		0.645934
2	2_2	INRA0008514	TB	0.112477	0.374509	0.290556	0.228381		0.582977
2	2_2	MARC0002205	LW	0.895734	0.930126	0.593849	0.855224	0.431969	0.42266
2	2_2	MARC0002205	TW	0.167005	0.574447	0.36666	0.803546	0.412777	0.270058
2	2_2	MARC0002205	LB	0.513116	0.854798	0.0899943	0.736886	0.506249	0.240929
2	2_2	MARC0002205	TB	0.117172	0.782829	0.627762	0.532391	0.420344	0.438285
2	2_2	MARC0093618	LW	0.822676	0.976084	0.573663	0.709321	0.241503	0.633591
2	2_2	MARC0093618	TW	0.73978	0.766787	0.986191	0.406274	0.339659	0.522711
2	2_2	MARC0093618	LB	0.752112	0.512871	0.188347	0.3271	0.406797	0.699419
2	2_2	MARC0093618	TB	0.922775	0.574101	0.564273	0.598706	0.407377	0.533972
2	2_2	MARC0097248	LW	0.498784	0.407833	0.216512	0.940356	0.407638	0.988718
2	2_2	MARC0097248	TW	0.373914	0.834911	0.34764	0.650849	0.65999	0.304726
2	2_2	MARC0097248	LB	0.95934	0.0708474	0.429795	0.818105	0.46594	0.111751
2	2_2	MARC0097248	TB	0.277054	0.477111	0.766903	0.685252	0.943072	0.0731292
5	5_1	ALGA0033024	LW	0.505598	0.670013	0.540374	0.723715	0.40716	0.0864919
5	5_1	ALGA0033024	TW	0.942007	0.602866	0.92282	0.812143	0.509387	0.062266
5	5_1	ALGA0033024	LB	0.370513	0.876905	0.0569381	0.697414	0.116294	0.723059
5	5_1	ALGA0033024	TB	0.48354	0.965237	0.344405	0.653138	0.0901118	0.43631
5	5_1	ALGA0033038	LW	0.992027	0.166202	0.831579	0.234566	0.550252	0.684914
5	5_1	ALGA0033038	TW	0.463142	0.691159	0.967136	0.135126	0.56019	0.954895
5	5_1	ALGA0033038	LB	0.623409	0.470437	0.918011	0.711001	0.535987	0.271939
5	5_1	ALGA0033038	TB	0.91064	0.880784	0.988718	0.448091	0.453825	0.217607
5	5_1	ALGA0033048	LW	0.0704145	0.163197	0.898486	0.954197	0.439635	0.724777
5	5_1	ALGA0033048	TW	0.328459	0.18538	0.608137	0.316986	0.379995	0.634864
5	5_1	ALGA0033048	LB	0.980461	0.877415	0.452806	0.506972	0.20841	0.242095
5	5_1	ALGA0033048	TB	0.826965	0.859152	0.620047	0.496129	0.0541525	0.570803
5	5_1	ALGA0106378	LW	0.400361	0.426368	0.589546	0.905492	0.399755	0.387511
5	5_1	ALGA0106378	TW	0.253811	0.731425	0.772652	0.821703	0.91351	0.346282
5	5_1	ALGA0106378	LB	0.840144	0.478815	0.606236	0.769733	0.614791	0.773821
5	5_1	ALGA0106378	TB	0.249997	0.106956	0.82449	0.974775	0.695707	0.992022
5	5_1	ALGA0119342	LW	0.904561	0.405007	0.91845	0.182749	0.523788	0.256635
5	5_1	ALGA0119342	TW	0.803994	0.874969	0.6332	0.152383	0.602798	0.328187
5	5_1	ALGA0119342	LB	0.888963	0.899989	0.233375	0.227954	0.596342	0.825707
5	5_1	ALGA0119342	TB	0.723939	0.919963	0.202454	0.649553	0.716904	0.795921
5	5_1	ASGA0026387	LW	0.501989		0.0273086	0.32424		0.150396
5	5_1	ASGA0026387	TW	0.230326		0.668828	0.621321		0.046293
5	5_1	ASGA0026387	LB	0.159651		0.159146	0.661366		0.0594169
5	5_1	ASGA0026387	TB	0.504673		0.601866	0.738801		0.0419805
5	5_1	ASGA0026395	LW	0.371919	0.0546367	0.46486	0.974776	0.673408	0.479197
5	5_1	ASGA0026395	TW	0.449608	0.10865	0.744024	0.992022	0.672543	0.531906
5	5_1	ASGA0026395	LB	0.788913	0.521556	0.773045	0.210055	0.966161	0.409262
5	5_1	ASGA0026395	TB	0.470438	0.939303	0.711432	0.594124	0.97124	0.756089
5	5_1	ASGA0099577	LW	0.87273		0.655569	0.767801		0.838599
5	5_1	ASGA0099577	TW	0.895735		0.3006	0.584766		0.92443
5	5_1	ASGA0099577	LB	0.519787		1	0.039049		0.334667
5	5_1	ASGA0099577	TB	0.532389		0.731807	0.024215		0.290398
5	5_1	H3GA0016893	LW	0.931962		0.948983	0.658022		0.173223
5	5_1	H3GA0016893	TW	0.571927		0.39356	0.868071		0.221803
5	5_1	H3GA0016893	LB	0.103986	0.23943	0.0149462	0.820315		0.323799
5	5_1	H3GA0016893	TB	0.017824	0.908202	0.321268	0.931916		0.867353
5	5_1	H3GA0056714	LW	0.94367	0.822677	0.383226	0.140227	0.62615	0.226851
5	5_1	H3GA0056714	TW	0.689225	0.700504	0.808709	0.0805661	0.55726	0.238292
5	5_1	H3GA0056714	LB	0.292961	0.685011	0.487214	0.317401	0.504474	0.662859
5	5_1	H3GA0056714	TB	0.26443	0.484745	0.530869	0.743836	0.705437	0.665955
5	5_1	INRA0020046	LW	0.972386	0.302234	0.943109	0.578363	0.53752	0.898423
5	5_1	INRA0020046	TW	0.289783	0.115887	0.538066	0.77304	0.310459	0.59312
5	5_1	INRA0020046	LB	0.156957	0.549816	0.480616	0.10307	0.514345	0.770649
5	5_1	INRA0020046	TB	0.0122542	0.697729	0.745253	0.393685	0.496501	0.710299
5	5_1	INRA0057593	LW	0.230687	0.807753	0.403911	0.16445	0.642315	0.233874
5	5_1	INRA0057593	TW	0.37404	0.751786	0.574214	0.105607	0.589136	0.235313
5	5_1	INRA0057593	LB	0.966164	0.828576	0.159484	0.314109	0.508228	0.560154
5	5_1	INRA0057593	TB	0.583773	0.374267	0.374569	0.755844	0.732001	0.490694
5	5_1	INRA0057837	LW	0.244699	0.426457	0.675713	0.864337	0.363699	0.462985
5	5_1	INRA0057837	TW	0.242308	0.693027	0.992027	0.787476	0.941429	0.359234
5	5_1	INRA0057837	LB	0.546325	0.701761	0.517581	0.67722	0.404355	0.581295
5	5_1	INRA0057837	TB	0.163464	0.244756	0.807161	0.913139	0.885882	0.787603
5	5_1	MARC0031687	LW	1	0.172646	0.812915	0.637729	0.435267	0.843075
5	5_1	MARC0031687	TW	0.285145	0.0662143	0.371622	1	0.475231	0.542645
5	5_1	MARC0031687	LB	0.0984937	0.425574	0.49318	0.457508	0.29137	0.886988
5	5_1	MARC0031687	TB	0.0104672	0.61143	0.797888	0.889517	0.265718	0.463434
5	5_1	MARC0051550	LW	0.102374	0.663167	0.986193	0.715693	0.0672356	0.790062
5	5_1	MARC0051550	TW	0.184	0.825677	0.475168	0.751268	0.511193	0.693101
5	5_1	MARC0051550	LB	0.188598	0.642652	0.695094	0.0274928	0.925267	0.427115
5	5_1	MARC0051550	TB	0.258218	0.812156	0.207043	0.0086324	0.687803	0.217051
6	6_1	ALGA0037079	LW	0.29994	0.443718	0.66882	0.482682	0.172495	0.106964
6	6_1	ALGA0037079	TW	0.471589	0.122141	0.689774	0.177923	0.405493	0.221432
6	6_1	ALGA0037079	LB	0.966164	0.726171	0.796536	0.271365	0.769603	0.924844
6	6_1	ALGA0037079	TB	0.467471	0.679901	0.601266	0.140073	0.76104	0.699419
6	6_1	ALGA0037091	LW	0.855529	0.0346608	0.860347	0.252855	0.190002	0.737467
6	6_1	ALGA0037091	TW	0.901953	0.018916	0.942557	0.172865	0.199329	0.86342
6	6_1	ALGA0037091	LB	0.172671	0.676551	0.653495	0.134341	0.641594	0.299438
6	6_1	ALGA0037091	TB	0.17783	0.574223	0.869503	0.184023	0.490101	0.154357
6	6_1	ALGA0037093	LW	0.506175	0.395072	0.732192	0.736569	0.960933	0.172104
6	6_1	ALGA0037093	TW	0.841991	0.477407	0.923643	0.609977	0.529763	0.21343
6	6_1	ALGA0037093	LB	0.569236	0.0204523	0.490752	0.600693	0.825707	0.764194
6	6_1	ALGA0037093	TB	0.788339	0.242488	0.624563	0.478361	0.293285	0.438057
6	6_1	ASGA0029647	LW	0.0970204	0.896038	0.0340702	0.858928	0.279958	0.187054
6	6_1	ASGA0029647	TW	0.10966	0.974792	0.151306	0.830746	0.469065	0.354059
6	6_1	ASGA0029647	LB	0.924014	0.584274	0.859152	0.0940213	0.363173	0.802138
6	6_1	ASGA0029647	TB	0.927421	0.810361	0.738713	0.154458	0.56294	0.792813
6	6_1	ASGA0029648	LW	0.9279	0.952191	0.630574	0.25141	0.967116	0.763197
6	6_1	ASGA0029648	TW	0.952191	0.376577	0.443958	0.161408	0.858048	0.485942
6	6_1	ASGA0029648	LB	0.104746	0.891827	0.752713	0.439507	0.109215	0.339383
6	6_1	ASGA0029648	TB	0.265757	1	1	0.362275	0.154418	0.226834
6	6_1	ASGA0029650	LW	0.314048	0.561026	0.52347	0.0799795	0.659579	0.593963
6	6_1	ASGA0029650	TW	0.535678	0.0516649	0.701372	0.0613726	0.539776	0.865029
6	6_1	ASGA0029650	LB	0.571748	0.480177	0.758202	0.943632	0.286654	0.542498
6	6_1	ASGA0029650	TB	0.984046	0.608002	0.955606	0.836114	0.217291	0.92035
6	6_1	ASGA0029651	LW	0.936783	0.624449	0.363465	0.248124	0.775979	0.350582
6	6_1	ASGA0029651	TW	0.925741	0.571202	0.167973	0.268822	0.916105	0.171932
6	6_1	ASGA0029651	LB	0.256479	0.262296	0.666748	0.295479	0.667814	0.587511
6	6_1	ASGA0029651	TB	0.307815	0.20307	0.476502	0.435064	0.473329	0.711404
6	6_1	ASGA0029653	LW	0.0391911	0.820781	0.253091	0.56048	0.732902	0.569941
6	6_1	ASGA0029653	TW	0.0674056	0.944235	0.392906	0.97607	0.612181	0.611146
6	6_1	ASGA0029653	LB	0.114823	0.782969	0.295637	0.178472	0.809538	0.805721
6	6_1	ASGA0029653	TB	0.0752819	0.870706	0.0810858	0.71302	0.741648	0.83706
6	6_1	DRGA0006943	LW	0.644258			0.329854	0.109495	0.284662
6	6_1	DRGA0006943	TW	0.377408			0.160732	0.675234	0.105831
6	6_1	DRGA0006943	LB	0.667424		0.0209393	0.128649	0.595818	0.622365
6	6_1	DRGA0006943	TB	0.955606		0.0267374	0.124555	0.679249	0.358004
6	6_1	H3GA0018934	LW	0.333216	0.899417	0.306849	0.416209	0.129975	0.572279
6	6_1	H3GA0018934	TW	0.414109	0.441101	0.759215	0.285225	0.223887	0.229457
6	6_1	H3GA0018934	LB	0.629081	0.821017	0.988718	0.118106	0.0257898	0.77772
6	6_1	H3GA0018934	TB	0.915357	0.799097	0.674021	0.146923	0.0626885	0.268064
6	6_1	H3GA0018935	LW	0.865345	0.224438	0.773851	0.670995	0.778009	0.896277
6	6_1	H3GA0018935	TW	0.90622	0.122631	0.923645	0.0861531	0.752949	0.962595
6	6_1	H3GA0018935	LB	0.770279	0.666918	0.371952	0.163918	0.554887	0.546276
6	6_1	H3GA0018935	TB	0.643174	0.779515	0.544953	0.0150543	0.856727	0.496176
6	6_1	H3GA0018938	LW	0.852756	0.18877	0.657267	0.799093	0.420791	0.897805
6	6_1	H3GA0018938	TW	0.859013	0.0376953	0.632718	0.174664	0.441825	0.503658
6	6_1	H3GA0018938	LB	0.703216	0.186558	0.297184	0.445266	0.854784	0.932853
6	6_1	H3GA0018938	TB	0.926554	0.176852	0.213776	0.690842	0.836492	0.502615
6	6_1	H3GA0018940	LW	0.016125	0.160383	0.507661	0.695165	0.949578	0.364659
6	6_1	H3GA0018940	TW	0.0763836	0.528957	0.788035	0.844664	0.37437	0.366884
6	6_1	H3GA0018940	LB	0.259282	0.635096	0.850992	0.470078	0.623154	0.682546
6	6_1	H3GA0018940	TB	0.32503	0.498987	0.25455	0.928292	0.796817	0.840323
6	6_1	INRA0022467	LW	0.682331	0.542755	0.647843	0.160281	0.782546	0.420183
6	6_1	INRA0022467	TW	0.595675	0.593597	0.596066	0.0339061	0.59808	0.76244
6	6_1	INRA0022467	LB	0.60374	0.449222	0.475765	0.0678439	0.908538	0.877148
6	6_1	INRA0022467	TB	0.185029	0.476329	0.611983	0.0302285	0.771174	0.934284
7	7_1	ALGA0045777	LW	0.138987		0.401152	0.0854559	0.792096	0.23417
7	7_1	ALGA0045777	TW	0.0898415		0.455696	0.199546	0.506099	0.189782
7	7_1	ALGA0045777	LB	0.292133	0.482961	0.38588	0.0859993	0.382043	0.184396
7	7_1	ALGA0045777	TB	0.103079	0.784087	0.119955	0.295567	0.423944	0.164199
7	7_1	ALGA0045832	LW	0.122366	0.744134	0.799067	0.670994		0.482372
7	7_1	ALGA0045832	TW	0.122054	0.436767	0.270029	0.797733		0.305161
7	7_1	ALGA0045832	LB	0.005451	0.134576	0.0922787	1		0.657505
7	7_1	ALGA0045832	TB	0.0040525	0.225542	0.0117912	0.917619		0.534501
7	7_1	ALGA0045841	LW	0.276117	0.237639	0.429551	0.0007663	0.367269	0.604674
7	7_1	ALGA0045841	TW	0.197504	0.571221	0.418253	0.0031344	0.916861	0.278667
7	7_1	ALGA0045841	LB	0.158994	0.798947	0.158544	0.0219679	0.831282	0.715363
7	7_1	ALGA0045841	TB	0.28464	0.836697	0.142691	0.105885	0.67722	0.4598
7	7_1	ALGA0045847	LW	0.908599	0.525868	0.374849	0.0007891	0.446374	0.676281
7	7_1	ALGA0045847	TW	0.672073	0.886787	0.339343	0.0031321	0.909935	0.176689
7	7_1	ALGA0045847	LB	0.291941	0.749485	0.709527	0.0174434	0.614722	0.799079
7	7_1	ALGA0045847	TB	0.266878	0.27671	0.874887	0.093648	0.941968	0.400564
7	7_1	ALGA0045855	LW	0.977452	0.54107	0.878768	0.0006855	0.454076	0.63062
7	7_1	ALGA0045855	TW	0.821983	0.491981	0.904224	0.0022614	0.933331	0.161055
7	7_1	ALGA0045855	LB	0.240584	0.151745	0.582085	0.0214229	0.859139	0.938262
7	7_1	ALGA0045855	TB	0.327084	0.54271	0.315391	0.118295	0.623226	0.603699
7	7_1	ALGA0045902	LW	0.673445	0.133279	0.555518	0.825366	0.695637	0.534859
7	7_1	ALGA0045902	TW	0.53062	0.0586527	0.866738	0.901253	0.63062	0.391898
7	7_1	ALGA0045902	LB	0.0719293	0.544075	0.390497	0.28838	0.0446365	0.866649
7	7_1	ALGA0045902	TB	0.0682078	0.198469	0.238431	0.10697	0.025209	0.977437
7	7_1	ALGA0045929	LW	0.879029	0.837934	0.787325	0.113179	0.195143	0.0697376
7	7_1	ALGA0045929	TW	0.208415	0.834539	0.782407	0.157264	0.376039	0.0847314
7	7_1	ALGA0045929	LB	0.0779076	0.747712	0.174107	0.182073	0.388439	0.040605
7	7_1	ALGA0045929	TB	0.0201752	0.60848	0.0220815	0.417568	0.148634	0.0194325
7	7_1	ALGA0115984	LW	0.82565	0.4326	0.791643	0.448339	0.950853	0.0471961
7	7_1	ALGA0115984	TW	0.939863	0.984055	0.555018	0.497618	0.484241	0.0498882
7	7_1	ALGA0115984	LB	0.750675	0.136566	0.164868	0.31629	0.463185	0.269355
7	7_1	ALGA0115984	TB	0.941974	0.205369	0.103017	0.223822	0.859583	0.390166
7	7_1	ASGA0037212	LW	0.679076	0.613806	0.618567	0.585399	0.620254	0.294634
7	7_1	ASGA0037212	TW	0.208263	0.616529	0.732881	0.543358	0.401393	0.141167
7	7_1	ASGA0037212	LB	0.485919	0.378637	0.0112527	0.704751	0.327911	0.319958
7	7_1	ASGA0037212	TB	0.49895	0.642175	0.105549	0.398905	0.658078	0.253653
7	7_1	ASGA0037226	LW	0.147368	0.0372157	0.758595	0.967116	0.656069	0.724459
7	7_1	ASGA0037226	TW	0.036749	0.0199688	0.203222	0.680161	0.308612	0.460342
7	7_1	ASGA0037226	LB	0.148951	0.224302	0.0064617	0.250202	0.386882	0.418455
7	7_1	ASGA0037226	TB	0.238448	0.935261	0.0002873	0.265834	0.710199	0.280503
7	7_1	ASGA0037263	LW	0.566916	0.226078	0.44844	0.0006498	0.3281	0.597751
7	7_1	ASGA0037263	TW	0.287692	0.489433	0.373937	0.0027316	0.919174	0.167925
7	7_1	ASGA0037263	LB	0.30142	0.849953	0.53397	0.0234106	0.46594	0.980459
7	7_1	ASGA0037263	TB	0.474336	0.756724	0.527697	0.115837	0.935746	0.598047
7	7_1	ASGA0037273	LW	0.883512	0.963476	0.686753	0.0085988	0.366592	0.986183
7	7_1	ASGA0037273	TW	0.966184	0.40777	0.882441	0.0098936	0.693007	0.352414
7	7_1	ASGA0037273	LB	0.344812	0.596645	0.337466	0.0859154	0.371033	0.353186
7	7_1	ASGA0037273	TB	0.703802	0.855443	0.164345	0.170875	0.432328	0.762044
7	7_1	ASGA0037284	LW	0.623304	0.440692	0.469308	0.0003355	0.622038	0.957059
7	7_1	ASGA0037284	TW	0.815056	0.283764	0.715574	0.0037312	0.735119	0.546261
7	7_1	ASGA0037284	LB	0.136057	0.865496	0.899359	1.94e-05	0.863182	0.0378672
7	7_1	ASGA0037284	TB	0.149715	0.866194	0.939303	9.02e-05	0.78267	0.006663
7	7_1	ASGA0037311	LW	0.316158		0.414663	0.225836	0.377933	0.195091
7	7_1	ASGA0037311	TW	0.530883		0.780882	0.230718	0.100033	0.391575
7	7_1	ASGA0037311	LB	0.530295		0.494378	0.884515	0.108616	0.133804
7	7_1	ASGA0037311	TB	0.162191		0.823266	0.528474	0.293175	0.535828
7	7_1	ASGA0037322	LW	0.370406	0.527766	0.254694	0.252222	0.235114	0.807157
7	7_1	ASGA0037322	TW	0.860567	0.399236	0.0998397	0.332126	0.123792	0.335851
7	7_1	ASGA0037322	LB	0.912423	0.470096	0.55335	0.326849	0.857163	0.144395
7	7_1	ASGA0037322	TB	0.624924	0.276	0.361776	0.225756	0.610014	0.498462
7	7_1	ASGA0037327	LW	0.908943	0.617533	0.747393	0.167223	0.608129	0.758816
7	7_1	ASGA0037327	TW	0.564742	0.138781	0.265785	0.157908	0.414032	0.261611
7	7_1	ASGA0037327	LB	0.931459	0.345025	0.819138	0.0885818	0.836492	0.216222
7	7_1	ASGA0037327	TB	0.728214	0.479823	0.750436	0.0382404	0.88671	0.7168
7	7_1	ASGA0089052	LW	0.192211	0.439531	0.564218	0.386974	0.819305	0.109362
7	7_1	ASGA0089052	TW	0.348347	0.720214	0.619303	0.462613	0.658514	0.0726176
7	7_1	ASGA0089052	LB	0.87389	0.0552239	0.425903	0.262522	0.544463	0.374008
7	7_1	ASGA0089052	TB	0.798643	0.150667	0.129467	0.161407	0.916855	0.649869
7	7_1	ASGA0094477	LW	0.875718	0.250413	0.584954	0.398663	1	0.0770829
7	7_1	ASGA0094477	TW	0.648887	0.277955	0.845568	0.530546	0.53338	0.140484
7	7_1	ASGA0094477	LB	0.719313	0.81004	0.661402	0.216584	0.357436	0.113566
7	7_1	ASGA0094477	TB	0.940357	0.934774	0.978896	0.161076	0.744648	0.438934
7	7_1	DIAS0001804	LW	0.553473	0.601767	0.980474	0.309396	0.650458	0.586602
7	7_1	DIAS0001804	TW	0.641512	0.835487	0.519522	0.317508	0.578679	0.882105
7	7_1	DIAS0001804	LB	0.390734	0.32106	0.0166234	0.299221	0.562303	0.964332
7	7_1	DIAS0001804	TB	0.34163	0.777202	0.0079484	0.113027	0.368067	0.627288
7	7_1	H3GA0023820	LW	0.254802	0.115949	0.414133	0.522054	0.834064	0.26451
7	7_1	H3GA0023820	TW	0.0665465	0.0579009	0.189325	0.733124	0.79955	0.286689
7	7_1	H3GA0023820	LB	0.753802	0.709929	0.0330537	0.066381	0.389271	0.138441
7	7_1	H3GA0023820	TB	0.385446	0.683569	0.0352815	0.0985743	0.623659	0.197782
7	7_1	H3GA0023839	LW	0.469219	0.0720508	0.594183	1	0.589455	0.885068
7	7_1	H3GA0023839	TW	0.818232	0.0445524	0.894538	0.868071	0.363205	0.69839
7	7_1	H3GA0023839	LB	0.228838	0.841116	0.876651	0.293612	0.841883	0.964332
7	7_1	H3GA0023839	TB	0.0746688	0.828217	0.884798	0.0850798	0.456492	0.665367
7	7_1	H3GA0023850	LW	0.132548	0.235355	0.898484	0.980461	0.882637	0.575671
7	7_1	H3GA0023850	TW	0.0094317	0.314381	0.512288	0.889241	0.416986	0.848713
7	7_1	H3GA0023850	LB	0.0300524	0.667763	0.0196362	0.643368	0.838971	0.0407276
7	7_1	H3GA0023850	TB	0.0282059	0.525534	0.0362068	0.585929	0.47445	0.228735
7	7_1	H3GA0023922	LW	0.974791		0.223602	0.667501		0.668264
7	7_1	H3GA0023922	TW	0.373452		0.858792	0.531329		0.557889
7	7_1	H3GA0023922	LB	0.585216	0.120202	0.215011	0.392583		0.190575
7	7_1	H3GA0023922	TB	0.327437	0.20697	0.328979	0.146425		0.456208
7	7_1	M1GA0011383	LW	0.178032	0.176448	0.717935	0.309387	0.205029	0.0307742
7	7_1	M1GA0011383	TW	0.0907683	0.0410515	0.59529	0.401626	0.198046	0.189611
7	7_1	M1GA0011383	LB	0.112501	0.907177	0.839372	0.0557272	0.363029	0.349501
7	7_1	M1GA0011383	TB	0.0757613	0.693014	0.535615	0.0489395	0.445619	0.39907
7	7_1	M1GA0011398	LW	0.633628	0.820958	0.94961	0.0008662	0.465323	0.380155
7	7_1	M1GA0011398	TW	0.449934	0.397031	0.884597	0.0030003	0.961755	0.050635
7	7_1	M1GA0011398	LB	0.184362	0.173613	0.350799	0.0149639	0.78156	0.667053
7	7_1	M1GA0011398	TB	0.284515	0.546107	0.242235	0.0832966	0.738802	0.310394
7	7_1	M1GA0011429	LW	0.0672993	0.708415	0.470911	0.0015245	0.49954	0.261197
7	7_1	M1GA0011429	TW	0.14926	0.914295	0.0727962	0.0095585	0.986183	0.733786
7	7_1	M1GA0011429	LB	0.669889	0.281548	0.750317	0.0007749	0.753051	0.0814506
7	7_1	M1GA0011429	TB	0.643714	0.481544	0.552168	0.0054805	0.899978	0.16222
7	7_1	MARC0045334	LW	0.0767125	0.54135	0.765635	0.732901	0.653808	0.610595
7	7_1	MARC0045334	TW	0.0902199	0.121609	0.80398	0.753311	0.370585	0.157887
7	7_1	MARC0045334	LB	0.634571	0.103139	0.477591	0.344431	0.371271	0.921954
7	7_1	MARC0045334	TB	0.582023	0.168811	0.729406	0.477793	0.144253	0.977437
7	7_1	MARC0064679	LW	0.525457	0.906218	0.320936	1	0.432158	0.832581
7	7_1	MARC0064679	TW	0.687576	0.791934	0.809349	0.73434	0.432307	0.561814
7	7_1	MARC0064679	LB	0.888678	0.270533	0.685012	0.143768	0.892693	0.596014
7	7_1	MARC0064679	TB	0.841702	0.281797	0.844668	0.140057	0.774354	0.239245
8	8_1	ALGA0049801	LW	0.204577	0.0802457	0.77029	0.705166	0.213937	0.360123
8	8_1	ALGA0049801	TW	0.346515	0.0451261	0.189102	0.697819	0.0997186	0.178982
8	8_1	ALGA0049801	LB	0.521607	0.0073189	0.648481	0.44648	0.16145	0.332678
8	8_1	ALGA0049801	TB	0.932859	0.0020743	0.587492	0.81476	0.105999	0.329912
8	8_1	ALGA0049819	LW	0.270725	0.829582	0.772921	0.0329963	0.960128	0.36577
8	8_1	ALGA0049819	TW	0.255309	0.461836	0.593218	0.12685	0.570719	0.237719
8	8_1	ALGA0049819	LB	0.674369	0.673675	0.102328	0.056141	0.899978	0.278203
8	8_1	ALGA0049819	TB	0.287939	0.496605	0.04257	0.157707	0.898726	0.195419
8	8_1	ALGA0049826	LW	0.208491	0.927029	0.801199	0.564673	0.0729742	0.315326
8	8_1	ALGA0049826	TW	0.38785	0.742062	0.89424	0.699347	0.175732	0.330207
8	8_1	ALGA0049826	LB	0.912785	0.439191	0.151658	0.548766	0.0916928	0.988717
8	8_1	ALGA0049826	TB	0.429093	0.796088	0.229561	0.568416	0.249879	0.6457
8	8_1	ALGA0049832	LW	0.007351	0.43833	0.0754445	0.0347462	0.813782	0.986183
8	8_1	ALGA0049832	TW	0.0470639	0.511565	0.104981	0.0357678	0.71467	0.489921
8	8_1	ALGA0049832	LB	0.0515731	0.0672085	0.874139	0.0376247	0.187883	0.0439742
8	8_1	ALGA0049832	TB	0.0977785	0.113739	0.890098	0.160715	0.225615	0.354193
8	8_1	ALGA0105059	LW	0.0235045	0.253989	0.870553	0.235586	0.477626	0.352613
8	8_1	ALGA0105059	TW	0.090634	0.18443	0.815902	0.218409	0.697439	0.673496
8	8_1	ALGA0105059	LB	0.122341	0.0512561	0.391212	0.323306	0.38908	1
8	8_1	ALGA0105059	TB	0.13464	0.0469003	0.0892227	0.391293	0.288425	0.385587
8	8_1	ALGA0114256	LW	0.341533	0.662943	0.414705	0.589903	0.250853	0.982163
8	8_1	ALGA0114256	TW	0.200285	0.826358	0.622868	0.942522	0.541613	0.370706
8	8_1	ALGA0114256	LB	0.0163946	0.875137	0.106391	0.555114	0.640673	0.452501
8	8_1	ALGA0114256	TB	0.0078961	0.924014	0.172865	0.421455	0.880248	0.147761
8	8_1	ALGA0115608	LW	0.0587219	0.34156	0.631535	0.0491962	0.0173051	0.0817031
8	8_1	ALGA0115608	TW	0.148851	0.11737	0.708515	0.0425716	0.132656	0.0526366
8	8_1	ALGA0115608	LB	0.0852805	0.0862069	0.073323	0.16776	0.0366783	0.217412
8	8_1	ALGA0115608	TB	0.28813	0.0104754	0.0503837	0.0778156	0.141344	0.344971
8	8_1	ALGA0117031	LW	0.0325843	0.895434	0.644023	0.28072	0.0758221	0.178954
8	8_1	ALGA0117031	TW	0.0951162	0.949608	0.708416	0.245677	0.255942	0.184556
8	8_1	ALGA0117031	LB	0.0146633	0.667593	0.153328	0.0505303	0.374643	0.164177
8	8_1	ALGA0117031	TB	0.0416764	0.292027	0.162698	0.0694167	0.941424	0.225424
8	8_1	ASGA0040077	LW	0.46623	0.427509	0.166682	0.718474	0.94712	0.500858
8	8_1	ASGA0040077	TW	0.617262	0.593602	0.349642	0.665225	0.435984	0.792682
8	8_1	ASGA0040077	LB	0.661318	0.0214314	0.169782	0.387421	0.541466	0.687345
8	8_1	ASGA0040077	TB	0.529254	0.0161188	0.0199471	0.416225	0.986182	0.685796
8	8_1	ASGA0040080	LW	0.0771028	0.343965	0.215229	0.0832799	0.217698	0.309739
8	8_1	ASGA0040080	TW	0.395942	0.473861	0.893065	0.0732315	0.263156	0.296507
8	8_1	ASGA0040080	LB	0.134791	0.610746	0.862741	0.142949	0.310112	0.992022
8	8_1	ASGA0040080	TB	0.07014	0.78339	0.343313	0.476488	0.712313	0.75818
8	8_1	ASGA0040084	LW	0.273805	0.19544	0.61349	0.0184406	0.173612	0.0469503
8	8_1	ASGA0040084	TW	0.256878	0.2262	0.751308	0.0057599	0.620538	0.0456288
8	8_1	ASGA0040084	LB	0.804642	0.497164	0.120972	0.0120341	0.15745	0.240641
8	8_1	ASGA0040084	TB	0.848102	0.27586	0.119417	0.0093767	0.317646	0.347037
8	8_1	ASGA0096320	LW	0.885978	0.894554	0.651147	0.266677		0.246147
8	8_1	ASGA0096320	TW	0.922834	0.942566	0.414245	0.193244		0.177202
8	8_1	ASGA0096320	LB	0.788918	0.205356	0.0892424	0.495576		0.639529
8	8_1	ASGA0096320	TB	0.535733	0.113947	0.182912	0.501813		0.781976
8	8_1	DRGA0008893	LW	0.667382	0.841795	0.929676	0.729946	0.168167	0.114485
8	8_1	DRGA0008893	TW	0.823894	0.690699	0.639036	0.816438	0.162734	0.0985129
8	8_1	DRGA0008893	LB	0.103132	0.28542	0.575075	0.961752	0.160261	0.700766
8	8_1	DRGA0008893	TB	0.325735	0.537962	0.792687	0.771175	0.319616	0.910986
8	8_1	H3GA0025546	LW	0.339378	0.149139	0.0862711	0.51677	0.51707	0.641776
8	8_1	H3GA0025546	TW	0.295856	0.0735745	0.117213	0.584515	0.756107	0.769229
8	8_1	H3GA0025546	LB	0.0241208	0.00461	0.750079	0.201992	0.940885	0.850979
8	8_1	H3GA0025546	TB	0.11132	0.003346	0.935261	0.355907	0.667814	0.680581
8	8_1	MARC0029617	LW	0.0036301	0.548978	0.0264852	0.0907011	0.903839	0.56292
8	8_1	MARC0029617	TW	0.0433322	0.580403	0.0329816	0.1189	0.813618	1
8	8_1	MARC0029617	LB	0.0052463	0.238631	0.545781	0.0223075	0.148304	0.0501585
8	8_1	MARC0029617	TB	0.0179037	0.252962	0.606715	0.150544	0.217216	0.304198
8	8_1	MARC0098423	LW	0.209106		0.335475	0.197055	0.627827	0.349563
8	8_1	MARC0098423	TW	0.193756		0.230918	0.700499	0.223169	0.292745
8	8_1	MARC0098423	LB	0.053786	0.774112	0.562121	0.420237	0.348346	0.355794
8	8_1	MARC0098423	TB	0.0262442	0.843476	0.374429	0.685524	0.338459	0.366588
9	9_1	ALGA0053835	LW	0.582304	0.388731	0.707323	0.393711	0.56774	0.309522
9	9_1	ALGA0053835	TW	0.984055	0.856391	0.54946	0.171624	0.97237	0.239374
9	9_1	ALGA0053835	LB	0.884255	0.937757	0.528011	0.132157	0.157343	0.350353
9	9_1	ALGA0053835	TB	0.954198	0.713354	0.490572	0.347252	0.205037	0.200133
9	9_1	ALGA0053842	LW	0.554742	0.194029	0.662951	0.565202	0.668434	0.0116622
9	9_1	ALGA0053842	TW	0.647147	0.0443644	0.498753	0.565319	0.555663	0.104919
9	9_1	ALGA0053842	LB	0.71724	0.780338	0.267053	0.791643	0.69075	0.612843
9	9_1	ALGA0053842	TB	0.523385	0.669037	0.149049	0.658978	0.704946	0.527749
9	9_1	ALGA0053846	LW	0.794136	0.753229	0.334859	0.359664	0.54091	0.0808347
9	9_1	ALGA0053846	TW	0.801356	0.725918	0.677815	0.207562	0.988718	0.115964
9	9_1	ALGA0053846	LB	0.926987	0.645658	0.199953	0.14448	0.149375	0.41071
9	9_1	ALGA0053846	TB	0.864801	0.628274	0.22548	0.285956	0.229733	0.332368
9	9_1	ALGA0053857	LW	0.731537	0.193241	0.625463	0.562395	0.470851	0.867363
9	9_1	ALGA0053857	TW	0.707823	0.438704	0.655412	0.602994	0.361674	0.478102
9	9_1	ALGA0053857	LB	0.560895	0.625505	0.35988	0.447894	0.547214	0.457305
9	9_1	ALGA0053857	TB	0.578619	0.914984	0.552449	0.40813	0.766752	0.29861
9	9_1	ALGA0053869	LW	0.623951	0.128519	0.258544	0.963454	0.794301	0.134423
9	9_1	ALGA0053869	TW	0.823723	0.243201	0.548251	0.558751	0.661972	0.114908
9	9_1	ALGA0053869	LB	0.950854	0.969111	0.104164	0.919954	0.503328	0.179361
9	9_1	ALGA0053869	TB	0.952832	0.974777	0.175923	0.806984	0.301851	0.0868226
9	9_1	ALGA0053892	LW	0.986191	0.739336	0.241452	0.482863	0.294169	0.129963
9	9_1	ALGA0053892	TW	0.843969	0.936785	0.182511	0.39042	0.406107	0.247191
9	9_1	ALGA0053892	LB	0.683478	0.451968	0.240095	0.0474517	0.314444	0.230024
9	9_1	ALGA0053892	TB	0.958566	0.254499	0.265278	0.0999275	0.333038	0.157148
9	9_1	ALGA0053897	LW	0.674237	0.652046	0.0647066	0.185883	0.951503	0.638717
9	9_1	ALGA0053897	TW	0.756023	0.383714	0.429986	0.108249	0.497665	0.903839
9	9_1	ALGA0053897	LB	0.843277	0.514748	0.472834	0.0236479	0.258197	0.15019
9	9_1	ALGA0053897	TB	0.656078	0.535562	0.437251	0.0959769	0.421815	0.250578
9	9_1	ALGA0053907	LW	0.501366	0.336086	0.401959	0.412568	0.396979	0.117798
9	9_1	ALGA0053907	TW	0.501982	0.721573	0.714241	0.211622	0.769489	0.166359
9	9_1	ALGA0053907	LB	0.916106	0.293179	0.218075	0.162747	0.22623	0.294511
9	9_1	ALGA0053907	TB	0.927421	0.219718	0.226903	0.376101	0.268826	0.248649
9	9_1	ALGA0105557	LW	0.92282	0.463188	0.145439	0.294957	0.340456	0.0572774
9	9_1	ALGA0105557	TW	0.911401	0.815718	0.31291	0.124875	0.666319	0.0691153
9	9_1	ALGA0105557	LB	0.921155	0.701761	0.448314	0.185133	0.243285	0.103039
9	9_1	ALGA0105557	TB	0.896583	0.808275	0.541137	0.407754	0.283537	0.0630197
9	9_1	ALGA0105770	LW	0.209247			0.371184	0.37821	0.179968
9	9_1	ALGA0105770	TW	0.0908496			0.220189	0.783523	0.197461
9	9_1	ALGA0105770	LB	0.809235		0.909238	0.1509	0.253923	0.289129
9	9_1	ALGA0105770	TB	0.932389		0.874637	0.296762	0.318906	0.224402
9	9_1	ASGA0043776	LW	0.94311	0.371037	0.711813	0.703016	0.653969	0.0881058
9	9_1	ASGA0043776	TW	0.930127	0.128822	0.602733	0.666318	0.980461	0.688744
9	9_1	ASGA0043776	LB	0.582148	0.924431	0.353321	1	0.937244	0.567288
9	9_1	ASGA0043776	TB	0.352151	0.730167	0.31544	0.85393	0.736661	0.521654
9	9_1	ASGA0043784	LW	0.572641	0.0973017	0.113659	0.284154	0.33133	0.212399
9	9_1	ASGA0043784	TW	0.663111	0.533245	0.0767171	0.15224	0.695353	0.206649
9	9_1	ASGA0043784	LB	0.685555	0.261312	0.103282	0.242129	0.201439	0.366441
9	9_1	ASGA0043784	TB	0.888115	0.133272	0.0908808	0.413978	0.272536	0.291154
9	9_1	ASGA0043789	LW	0.960956	0.116014	0.598291	0.306546	0.225349	0.18679
9	9_1	ASGA0043789	TW	0.833422	0.413486	0.782266	0.226012	0.307542	0.559269
9	9_1	ASGA0043789	LB	0.60671	0.366402	0.299058	0.160533	0.68872	0.781006
9	9_1	ASGA0043789	TB	0.576473	0.743398	0.492215	0.210273	0.643678	0.741076
9	9_1	ASGA0043790	LW	0.822502	0.833421	0.0900374	0.106261	0.201744	0.478015
9	9_1	ASGA0043790	TW	0.978908	0.523466	0.426337	0.0821518	0.573547	0.854581
9	9_1	ASGA0043790	LB	0.642554	0.720667	0.119332	0.280214	0.557566	0.69205
9	9_1	ASGA0043790	TB	0.737585	0.685102	0.087619	0.473587	0.661118	0.848497
9	9_1	ASGA0043793	LW	0.82707	0.218303	0.607249	0.584453	0.327673	0.838025
9	9_1	ASGA0043793	TW	0.847176	0.57543	0.641486	0.689758	0.258685	0.456746
9	9_1	ASGA0043793	LB	0.5844	0.729515	0.236402	0.466402	0.513852	0.458284
9	9_1	ASGA0043793	TB	0.554199	0.86004	0.381406	0.468044	0.725931	0.273035
9	9_1	ASGA0043797	LW	0.611486	0.898795	0.353372	0.382882	0.384479	0.228429
9	9_1	ASGA0043797	TW	0.573432	0.593862	0.270626	0.225536	0.79064	0.292158
9	9_1	ASGA0043797	LB	0.971243	0.620189	0.266956	0.207249	0.228381	0.241733
9	9_1	ASGA0043797	TB	0.992023	0.549037	0.176997	0.367736	0.30592	0.189827
9	9_1	ASGA0043799	LW	0.788037
9	9_1	ASGA0043799	TW	0.502461
9	9_1	ASGA0043799	LB	0.506159			0.465353
9	9_1	ASGA0043799	TB	0.26084			0.505384
9	9_1	ASGA0043815	LW	0.370414	0.10194	0.647451	0.732131	0.872408	0.0357793
9	9_1	ASGA0043815	TW	0.301976	0.241113	0.977452	0.784925	0.587291	0.0226743
9	9_1	ASGA0043815	LB	0.350959	0.609574	0.519687	0.772229	0.474622	0.0425313
9	9_1	ASGA0043815	TB	0.338357	0.639257	0.575497	0.895665	0.299775	0.0199866
9	9_1	ASGA0043828	LW	0.941463		0.0220504	0.701271	0.881309	0.0286055
9	9_1	ASGA0043828	TW	0.751542		0.0217027	0.819475	0.569882	0.017735
9	9_1	ASGA0043828	LB	0.0872369		0.307746	0.797568	0.441967	0.0292771
9	9_1	ASGA0043828	TB	0.0627082		0.155397	0.935255	0.257974	0.0129656
9	9_1	DRGA0009466	LW	0.390145	0.279212	0.434248	0.235596	0.73758	0.50404
9	9_1	DRGA0009466	TW	0.876218	0.724638	0.759964	0.0957838	0.92485	0.512711
9	9_1	DRGA0009466	LB	0.604009	0.849128	0.438161	0.154937	0.124905	0.633861
9	9_1	DRGA0009466	TB	0.561359	0.562638	0.615811	0.346735	0.0956475	0.407378
9	9_1	DRGA0009468	LW	0.568277	0.0624946	0.358244	0.624844	0.179749	0.362771
9	9_1	DRGA0009468	TW	0.920007	0.157029	0.417617	0.81198	0.785348	0.384762
9	9_1	DRGA0009468	LB	0.85674	0.584901	0.612744	0.0831281	0.302237	0.308984
9	9_1	DRGA0009468	TB	0.644334	0.414152	0.509933	0.1809	0.642981	0.21498
9	9_1	DRGA0009480	LW	0.916156	0.642483	0.325289	0.374582	0.552101	0.102689
9	9_1	DRGA0009480	TW	0.912836	0.816052	0.607997	0.226375	0.960128	0.122681
9	9_1	DRGA0009480	LB	0.86457	0.655753	0.205526	0.133089	0.153033	0.195979
9	9_1	DRGA0009480	TB	0.948336	0.663643	0.202294	0.264736	0.235167	0.153658
9	9_1	DRGA0009488	LW	0.847375	0.390644	0.0227816	0.745365	0.689481	0.25904
9	9_1	DRGA0009488	TW	0.772784	0.15302	0.0565886	0.482507	0.703309	0.150517
9	9_1	DRGA0009488	LB	0.315586	0.783248	0.81594	0.733323	0.930535	0.0994337
9	9_1	DRGA0009488	TB	0.268962	0.558876	0.951504	0.809057	0.753293	0.028185
9	9_1	DRGA0009489	LW	0.944234	0.291935	0.130203	0.285247	0.093183	0.256845
9	9_1	DRGA0009489	TW	0.889876	0.52597	0.327253	0.191763	0.278869	0.389968
9	9_1	DRGA0009489	LB	0.978896	0.978896	0.354412	0.114331	0.20005	0.345865
9	9_1	DRGA0009489	TB	0.970158	0.841116	0.495164	0.228782	0.296695	0.220704
9	9_1	DRGA0009493	LW	0.882974	0.189085	0.0645014	0.296655	0.339579	0.275798
9	9_1	DRGA0009493	TW	0.479019	0.202475	0.380588	0.153211	0.70972	0.378761
9	9_1	DRGA0009493	LB	0.290705	0.754527	0.982163	0.20256	0.219172	0.360259
9	9_1	DRGA0009493	TB	0.140605	0.931459	0.6448	0.361755	0.296142	0.222202
9	9_1	H3GA0027810	LW	0.357227	0.147538	0.543569	0.691241	0.843275	0.0225608
9	9_1	H3GA0027810	TW	0.279876	0.293957	0.881116	0.67813	0.666492	0.0094466
9	9_1	H3GA0027810	LB	0.433068	0.677341	0.424776	0.749937	0.492758	0.0393558
9	9_1	H3GA0027810	TB	0.395881	0.721296	0.49016	0.847884	0.3045	0.0186408
9	9_1	H3GA0027814	LW	0.403941	0.5718	0.350842	0.689757	0.872408	0.025774
9	9_1	H3GA0027814	TW	0.521997	0.29162	0.371817	0.842484	0.584829	0.0231006
9	9_1	H3GA0027814	LB	0.956327	0.971243	0.153408	0.885333	0.503853	0.0363359
9	9_1	H3GA0027814	TB	0.839178	0.836318	0.138721	0.796667	0.314085	0.0261229
9	9_1	H3GA0055357	LW	0.271752	0.0979794	0.926168	0.339606	0.358236	0.204937
9	9_1	H3GA0055357	TW	0.226869	0.634587	0.863275	0.188604	0.742356	0.257122
9	9_1	H3GA0055357	LB	0.3888	0.420127	0.558416	0.181828	0.234603	0.35752
9	9_1	H3GA0055357	TB	0.311585	0.235384	0.47425	0.369009	0.296828	0.337933
9	9_1	INRA0032051	LW	0.130858	0.0339904	0.0506499	0.0377679	0.39371	0.477316
9	9_1	INRA0032051	TW	0.0435978	0.0403223	0.499512	0.0471086	0.598146	0.465736
9	9_1	INRA0032051	LB	0.031634	0.0928355	0.0526815	0.775694	0.972368	0.931916
9	9_1	INRA0032051	TB	0.0233777	0.051391	0.229994	0.549545	0.745695	1
9	9_1	INRA0061492	LW	0.449676	0.250385	0.185408	0.796084	0.950853	0.220343
9	9_1	INRA0061492	TW	0.723578	0.392265	0.307836	0.704676	0.846271	0.234967
9	9_1	INRA0061492	LB	0.439498	0.197095	0.239178	0.317838	0.688537	0.186301
9	9_1	INRA0061492	TB	0.683478	0.154513	0.361894	0.360777	0.621577	0.269867
9	9_1	ISU10000738	LW	0.348793	0.310561	0.782129	0.771587	0.243816	0.617419
9	9_1	ISU10000738	TW	0.507435	0.265446	0.648085	0.295972	0.745598	0.609224
9	9_1	ISU10000738	LB	0.594687	0.695361	0.884798	0.0402322	0.541195	0.327908
9	9_1	ISU10000738	TB	0.611431	0.68601	0.861608	0.117276	0.851188	0.217564
9	9_1	MARC0004886	LW	0.900994		0.0338955	0.414981	0.417376	0.146747
9	9_1	MARC0004886	TW	0.754316		0.043308	0.239376	0.822742	0.155365
9	9_1	MARC0004886	LB	0.0636987		0.227115	0.153398	0.220199	0.373858
9	9_1	MARC0004886	TB	0.0953169		0.251885	0.307612	0.294074	0.286359
9	9_2	ALGA0105103	LW	0.59318	0.220501	0.272663	0.0835914	0.812144	0.273753
9	9_2	ALGA0105103	TW	0.194695	0.886519	0.201196	0.475321	0.897498	0.519477
9	9_2	ALGA0105103	LB	1	0.916864	0.899048	0.664194	0.648525	0.970155
9	9_2	ALGA0105103	TB	0.471128	0.366091	0.947726	0.644843	0.710701	0.770912
9	9_2	ALGA0105376	LW	0.120396	0.868392	0.414729	0.0915149	0.367769	0.366152
9	9_2	ALGA0105376	TW	0.0812648	0.984056	0.855533	0.0359301	0.482329	0.108714
9	9_2	ALGA0105376	LB	0.831116	0.0334562	0.537694	0.360748	0.7106	0.0546903
9	9_2	ALGA0105376	TB	0.637587	0.0252444	0.379674	0.392843	0.876133	0.0358883
9	9_2	ASGA0086088	LW	0.8515	0.986191	0.512686	0.134107	0.464694	0.303222
9	9_2	ASGA0086088	TW	0.684044	0.302625	0.398629	0.734785	0.372956	0.427867
9	9_2	ASGA0086088	LB	0.762698	0.0707328	0.798644	0.5968	0.992022	0.905485
9	9_2	ASGA0086088	TB	0.842488	0.0269446	0.884526	0.533393	0.91956	0.754991
9	9_2	ASGA0091887	LW	0.415257	0.529215	0.1316	0.101757	0.848509	0.205661
9	9_2	ASGA0091887	TW	0.163545	0.676261	0.0804128	0.50053	0.583139	0.394592
9	9_2	ASGA0091887	LB	0.70596	0.455307	0.581531	0.58955	0.857381	0.889518
9	9_2	ASGA0091887	TB	0.90062	0.082796	0.922776	0.654748	0.661284	0.661201
9	9_2	ASGA0092201	LW	0.676054		0.667296	0.831844
9	9_2	ASGA0092201	TW	0.344417		0.409406	0.46645
9	9_2	ASGA0092201	LB	0.597104		0.862286	0.896574
9	9_2	ASGA0092201	TB	0.60705		0.522215	0.286273
9	9_2	DBUN0000033	LW	0.174473	0.702335	0.772256	0.493905
9	9_2	DBUN0000033	TW	0.0481569	0.0844784	0.675186	1
9	9_2	DBUN0000033	LB	0.264124	0.963455	0.948336	0.481131
9	9_2	DBUN0000033	TB	0.721086	0.498706	0.19855	0.886988
9	9_2	H3GA0028761	LW	0.0506365	0.710408	0.432375	0.0379418	0.321298	0.50034
9	9_2	H3GA0028761	TW	0.0050805	0.871509	0.612104	0.09735	0.13084	0.870462
9	9_2	H3GA0028761	LB	0.328904	0.0523109	0.138848	0.566048	0.580736	0.53684
9	9_2	H3GA0028761	TB	0.133074	0.0542928	0.136831	0.75855	0.322684	0.889234
9	9_2	H3GA0055246	LW	0.929233	0.736535	0.42654	0.878956		0.441519
9	9_2	H3GA0055246	TW	0.205706	0.384855	0.31834	0.676632		1
9	9_2	H3GA0055246	LB	0.245287	0.669721	0.641019	0.106542		0.542281
9	9_2	H3GA0055246	TB	0.954198	0.0274586	0.572474	0.125985		0.824474
9	9_2	M1GA0027225	LW	0.359675	0.643327	0.390299	0.0476677	0.132149	0.687554
9	9_2	M1GA0027225	TW	0.261373	0.598888	0.239673	0.294609	0.0261682	0.206384
9	9_2	M1GA0027225	LB	0.244986	0.700026	0.860487	0.670541	0.364191	0.483795
9	9_2	M1GA0027225	TB	0.930087	0.915357	0.690967	0.773688	0.196812	0.65354
9	9_2	MARC0053023	LW	0.158513		0.431341	0.899357		0.343206
9	9_2	MARC0053023	TW	0.397471		0.670276	0.887833		0.70674
9	9_2	MARC0053023	LB	0.56165	0.867131	0.129029	0.0733226		0.61077
9	9_2	MARC0053023	TB	0.370128	0.316741	0.121376	0.204658		0.863411
9	9_2	MARC0058716	LW	0.212114		0.230097	0.799094		0.453354
9	9_2	MARC0058716	TW	0.42974		0.611914	0.916482		0.83295
9	9_2	MARC0058716	LB	0.574408	0.982163	0.0339656	0.0602576		0.976069
9	9_2	MARC0058716	TB	0.324289	0.364682	0.032222	0.142416		0.74119
9	9_2	MARC0060357	LW	0.244372	0.170513	0.988725	0.0561336	0.572762	0.906161
9	9_2	MARC0060357	TW	0.162591	0.128622	0.57762	0.090941	0.237769	0.674884
9	9_2	MARC0060357	LB	0.363165	0.101912	0.41175	0.470845	0.692796	0.234223
9	9_2	MARC0060357	TB	0.388132	0.0907576	0.105049	0.316942	0.389493	0.180839
9	9_2	MARC0063577	LW	0.218315	0.607989	0.95859	0.562511	0.451951	0.92443
9	9_2	MARC0063577	TW	0.0479287	0.806486	0.35848	0.992022	0.50361	0.3831
9	9_2	MARC0063577	LB	0.735123	0.930087	0.262389	0.978894	0.281951	0.560212
9	9_2	MARC0063577	TB	0.988718	0.389246	0.81182	0.916476	0.273294	0.17272
14	14_1	ALGA0082334	LW	0.891311	0.0162976	0.910692	0.545379	0.796832	0.769881
14	14_1	ALGA0082334	TW	0.932429	0.106044	0.259375	0.0706269	0.933808	0.387321
14	14_1	ALGA0082334	LB	0.525431	0.33253	0.436756	0.257435	0.79473	0.261479
14	14_1	ALGA0082334	TB	0.977439	0.992023	0.192231	0.0598913	0.506682	0.514345
14	14_1	ALGA0082346	LW	0.249959	0.289545	0.740363	0.170101	0.794746	0.992022
14	14_1	ALGA0082346	TW	0.603496	0.165412	0.937289	0.0068428	0.951503	0.795935
14	14_1	ALGA0082346	LB	0.153869	0.0058138	0.267952	0.131759	0.844454	0.283559
14	14_1	ALGA0082346	TB	0.0431029	0.0052545	0.273674	0.0193959	0.60256	0.251316
14	14_1	ALGA0082355	LW	0.395103	0.397359	0.866038	0.255684	0.360493	0.850158
14	14_1	ALGA0082355	TW	0.892472	0.125123	0.776658	0.0188872	0.331997	0.730162
14	14_1	ALGA0082355	LB	0.0609788	0.0010844	0.213764	0.209837	0.710299	0.223072
14	14_1	ALGA0082355	TB	0.0370804	0.0001349	0.40923	0.063225	0.862727	0.223462
14	14_1	ALGA0082360	LW	0.0512569	0.0045445	0.767955	0.685277	0.0011022	0.623257
14	14_1	ALGA0082360	TW	0.623026	0.0126991	0.895438	0.992022	0.0048784	0.599863
14	14_1	ALGA0082360	LB	0.0013324	0.0019922	0.504771	0.326297	0.0035076	0.880248
14	14_1	ALGA0082360	TB	0.0044256	0.0072311	0.966164	0.550158	0.0109167	0.442817
14	14_1	ASGA0067046	LW	0.650134	0.484767	0.532145	0.100899	0.55538	0.121151
14	14_1	ASGA0067046	TW	0.920404	0.387761	0.331748	0.0599586	0.438339	0.197557
14	14_1	ASGA0067046	LB	0.71488	0.949579	0.498052	0.244588	0.302329	0.783227
14	14_1	ASGA0067046	TB	0.117862	0.855874	0.736239	0.158135	0.203677	0.891527
14	14_1	ASGA0067067	LW	0.0768031	0.47208	0.949609	0.269825	0.268064	0.984046
14	14_1	ASGA0067067	TW	0.137376	0.865811	0.462176	0.0197268	0.366739	0.732572
14	14_1	ASGA0067067	LB	0.46959	0.503816	0.982163	0.141382	0.724544	0.219524
14	14_1	ASGA0067067	TB	0.356952	0.435775	0.908546	0.0422697	0.777043	0.355429
14	14_1	ASGA0067076	LW	0.218905	0.325065	0.980472	0.327446	0.551484	0.890096
14	14_1	ASGA0067076	TW	0.536371	0.240022	0.895737	0.049896	0.608335	0.708525
14	14_1	ASGA0067076	LB	0.0582465	0.0057375	0.346193	0.167427	0.784628	0.261083
14	14_1	ASGA0067076	TB	0.0392423	0.0024528	0.430907	0.0729565	1	0.388983
14	14_1	ASGA0067078	LW	0.238739	0.0498516	0.706146	0.0855843	0.68801	0.731145
14	14_1	ASGA0067078	TW	0.869104	0.0490912	0.397247	0.0406054	0.533643	0.791659
14	14_1	ASGA0067078	LB	0.0040731	0.147077	0.887276	0.157167	0.92698	0.274979
14	14_1	ASGA0067078	TB	0.0071497	0.0474493	0.840727	0.0954388	0.992022	0.1135
14	14_1	ASGA0067094	LW	0.893951		0.0994091	0.592345	0.0311854	0.846878
14	14_1	ASGA0067094	TW	0.557792		0.0377197	0.343931	0.19302	0.664639
14	14_1	ASGA0067094	LB	0.0446745	0.157823	0.251084	0.599831	0.344702	0.79473
14	14_1	ASGA0067094	TB	0.394582	0.156508	0.275186	0.346926	0.897491	0.916476
14	14_1	DRGA0014702	LW	0.791934	0.550685	0.861015	0.0849892	0.62405	0.207362
14	14_1	DRGA0014702	TW	0.813733	0.904554	0.685122	0.0666523	0.619256	0.201413
14	14_1	DRGA0014702	LB	0.66281	0.559739	0.466295	0.267092	0.169028	0.785898
14	14_1	DRGA0014702	TB	0.194173	0.256331	0.42481	0.235849	0.155776	0.890374
14	14_1	DRGA0014710	LW	0.713942	0.0334445	0.950242	0.514586	0.515925	0.896886
14	14_1	DRGA0014710	TW	0.707925	0.109474	0.41556	0.0879887	0.605821	0.598872
14	14_1	DRGA0014710	LB	0.869025	0.383088	0.250125	0.244552	0.73599	0.317717
14	14_1	DRGA0014710	TB	0.89329	0.750795	0.100488	0.0859103	0.953505	0.477619
14	14_1	H3GA0042706	LW	0.096279	0.547138	0.0260692	0.175721	0.117492	0.748769
14	14_1	H3GA0042706	TW	0.389763	0.558897	0.0390457	0.100852	0.263607	0.847691
14	14_1	H3GA0042706	LB	0.120327	0.656564	0.742937	0.963452	0.986182	0.657098
14	14_1	H3GA0042706	TB	0.0410105	0.918785	0.813786	0.641517	0.443049	0.531499
14	14_1	INRA0047826	LW	0.72326	0.160691	0.730228	0.536561	0.5507	0.912422
14	14_1	INRA0047826	TW	0.680553	0.383984	0.295176	0.0458095	0.806366	0.746885
14	14_1	INRA0047826	LB	0.905494	0.678045	0.277076	0.233449	0.938778	0.875126
14	14_1	INRA0047826	TB	0.483853	0.833695	0.145521	0.046239	0.906829	0.674858
14	14_1	INRA0047841	LW	0.798157	0.0385689	0.801043	0.398133	0.464441	0.851198
14	14_1	INRA0047841	TW	0.7034	0.160617	0.166301	0.0542685	0.629073	0.41125
14	14_1	INRA0047841	LB	0.646673	0.431797	0.565858	0.159612	0.657995	0.217442
14	14_1	INRA0047841	TB	0.908891	0.841702	0.266353	0.0484908	0.876639	0.537749
14	14_1	M1GA0019286	LW	0.0288205	0.85639	0.723045	0.422227	0.564673	0.312986
14	14_1	M1GA0019286	TW	0.184234	0.689223	0.394391	0.390737	0.597291	0.413473
14	14_1	M1GA0019286	LB	0.470138	0.224002	0.206727	0.251584	0.705928	0.207821
14	14_1	M1GA0019286	TB	0.740074	0.155854	0.523537	0.192658	0.594254	0.178388
14	14_1	M1GA0019306	LW	0.842592	0.117294	0.0579112	0.301517	0.065535	0.601525
14	14_1	M1GA0019306	TW	0.768615	0.219672	0.0871932	0.196603	0.128064	0.825367
14	14_1	M1GA0019306	LB	0.703999	0.662065	0.636681	0.924007	0.646952	0.37935
14	14_1	M1GA0019306	TB	0.506501	0.958566	0.288137	0.571403	0.287783	0.413211
17	17_1	ALGA0095032	LW	0.872487	0.341043	0.942557	0.11583	0.864567	0.710321
17	17_1	ALGA0095032	TW	0.872243	0.386407	0.947153	0.0485159	0.790351	0.665729
17	17_1	ALGA0095032	LB	0.349196	0.950212	0.170496	0.280915	0.90923	0.48639
17	17_1	ALGA0095032	TB	0.335583	0.80108	0.189345	0.128275	0.271563	0.287782
17	17_1	ALGA0095033	LW	0.980472	0.255584	0.54863	0.122978	0.878696	0.785066
17	17_1	ALGA0095033	TW	0.843766	0.246695	0.14353	0.0540562	0.783522	0.766512
17	17_1	ALGA0095033	LB	0.511937	0.980461	0.440684	0.32592	0.881829	0.307354
17	17_1	ALGA0095033	TB	0.644956	0.885343	0.336521	0.154681	0.257286	0.192343
17	17_1	ALGA0095034	LW	0.748104	0.257703	0.596853	0.122642	0.892116	0.645182
17	17_1	ALGA0095034	TW	0.838317	0.394369	0.769637	0.0478557	0.797132	0.654613
17	17_1	ALGA0095034	LB	0.101318	0.236651	0.950212	0.185658	0.90923	0.359514
17	17_1	ALGA0095034	TB	0.0978245	0.674629	0.992022	0.0668872	0.271642	0.190562
17	17_1	ALGA0095036	LW	0.10486	0.754571	0.813415	0.243258	0.692913	0.48153
17	17_1	ALGA0095036	TW	0.522893	0.708633	0.36093	0.147434	0.894176	0.630767
17	17_1	ALGA0095036	LB	0.519037	0.958566	0.259682	0.250667	0.768691	0.642981
17	17_1	ALGA0095036	TB	0.969111	0.951504	0.173311	0.141261	0.174917	0.408232
17	17_1	ALGA0095037	LW	0.871266	0.291122	0.527411	0.0891278	0.827497	0.731364
17	17_1	ALGA0095037	TW	0.736963	0.432231	0.688766	0.0373839	0.837072	0.94712
17	17_1	ALGA0095037	LB	0.0971025	0.232632	0.559164	0.189712	0.959336	0.344863
17	17_1	ALGA0095037	TB	0.0937027	0.666073	0.685555	0.0739742	0.368269	0.244709
17	17_1	ALGA0095040	LW	0.0127396	0.913197	0.779098	0.45569	0.561581	0.353165
17	17_1	ALGA0095040	TW	0.0866897	0.847782	0.630942	1	0.97607	0.568036
17	17_1	ALGA0095040	LB	0.620117	0.973546	0.825193	0.905152	0.806036	0.129128
17	17_1	ALGA0095040	TB	0.267225	0.624057	0.893585	0.69637	0.30523	0.048908
17	17_1	ALGA0095058	LW	0.817556	0.618667	0.282955	0.728966	0.848713	0.0967672
17	17_1	ALGA0095058	TW	0.37164	0.742062	0.479505	0.747119	0.933808	0.0880617
17	17_1	ALGA0095058	LB	0.0227842	0.477024	0.581525	0.597915	0.32477	0.931916
17	17_1	ALGA0095058	TB	0.0371137	0.700987	0.279976	0.456898	0.176969	0.701925
17	17_1	ALGA0095080	LW	0.265924	0.42412	0.721363	0.477185	0.792242	0.460917
17	17_1	ALGA0095080	TW	0.888743	0.165414	0.79831	0.232363	0.317856	0.511093
17	17_1	ALGA0095080	LB	0.621044	0.717136	0.0673202	0.218852	0.453665	0.147684
17	17_1	ALGA0095080	TB	0.327791	0.592354	0.0707004	0.121437	0.11822	0.240246
17	17_1	ASGA0076974	LW	0.879549	0.286613	0.574398	0.12422	0.876141	0.689849
17	17_1	ASGA0076974	TW	0.718454	0.426424	0.745066	0.0602191	0.755618	0.869022
17	17_1	ASGA0076974	LB	0.0902474	0.234756	0.942523	0.249005	1	0.18664
17	17_1	ASGA0076974	TB	0.0906171	0.672033	0.876651	0.132687	0.297184	0.13249
17	17_1	ASGA0076980	LW	0.081397	0.490986	0.962617	0.581952	0.595068	0.621321
17	17_1	ASGA0076980	TW	0.379181	0.260702	0.807278	0.17176	0.110288	0.79195
17	17_1	ASGA0076980	LB	0.890959	0.945935	0.629155	0.294379	0.651937	0.744763
17	17_1	ASGA0076980	TB	0.683747	0.982163	0.572169	0.278243	0.103291	0.929629
17	17_1	ASGA0076988	LW	0.571321	0.919614	0.892473	0.46034	0.873887	0.200668
17	17_1	ASGA0076988	TW	0.761711	0.795913	0.928783	0.311	0.719409	0.40032
17	17_1	ASGA0076988	LB	0.716828	0.861383	0.900302	0.325519	0.672777	0.349829
17	17_1	ASGA0076988	TB	0.724145	0.276831	0.722242	0.225361	0.121919	0.387929
17	17_1	ASGA0077003	LW	0.930581	0.220225	0.894239	0.548193	0.373977	0.125338
17	17_1	ASGA0077003	TW	0.936284	0.12012	0.922006	0.461123	1	0.219589
17	17_1	ASGA0077003	LB	0.120301	0.718999	0.79021	0.96093	0.79399	0.113543
17	17_1	ASGA0077003	TB	0.36743	0.944202	0.88896	0.827305	0.339039	0.163103
17	17_1	H3GA0048953	LW	0.76322	0.26039	0.595804	0.108431	0.840529	0.726165
17	17_1	H3GA0048953	TW	0.827246	0.395436	0.763221	0.0501557	0.807952	0.699155
17	17_1	H3GA0048953	LB	0.0959397	0.22391	0.735123	0.240297	0.902207	0.486525
17	17_1	H3GA0048953	TB	0.0785294	0.937756	0.858711	0.111688	0.258569	0.291479
17	17_1	H3GA0048967	LW	0.182716	0.6853	0.0991848	0.801076	0.953508	0.133806
17	17_1	H3GA0048967	TW	0.326777	0.567689	0.118722	0.579966	0.978895	0.162791
17	17_1	H3GA0048967	LB	0.0447749	0.855227	0.912064	0.530975	0.788749	0.851187
17	17_1	H3GA0048967	TB	0.32329	0.825546	0.490341	0.431544	0.47679	0.511099
17	17_1	H3GA0048983	LW	0.242225	0.543794	0.964356	0.407638	0.843471	0.346499
17	17_1	H3GA0048983	TW	0.81357	0.253119	0.586635	0.217191	0.325287	0.363408
17	17_1	H3GA0048983	LB	0.4924	0.527492	0.07588	0.18778	0.56717	0.318176
17	17_1	H3GA0048983	TB	0.336131	0.787481	0.14994	0.123853	0.146186	0.518127
17	17_1	INRA0053914	LW	0.847783	0.325403	0.850042	0.139908	0.896886	0.781852
17	17_1	INRA0053914	TW	0.955631	0.298702	0.294772	0.0654282	0.754401	0.720975
17	17_1	INRA0053914	LB	0.626449	0.984046	0.837646	0.354557	0.834798	0.413978
17	17_1	INRA0053914	TB	0.628787	0.874387	0.450848	0.166383	0.230671	0.227582
17	17_1	INRA0053929	LW	0.724333	0.371325	0.79682	0.296723	0.970157	0.21671
17	17_1	INRA0053929	TW	0.950885	0.326559	0.419368	0.310343	0.437462	0.322061
17	17_1	INRA0053929	LB	0.597499	0.992023	0.440649	0.519332	0.868536	0.314252
17	17_1	INRA0053929	TB	0.66165	0.889528	0.227211	0.406049	0.469272	0.327126
17	17_2	ALGA0096471	LW	0.730115	0.658493	0.472828	0.0179074	0.0501382	0.381699
17	17_2	ALGA0096471	TW	0.818737	0.823197	0.611344	0.0091381	0.116192	0.175814
17	17_2	ALGA0096471	LB	0.0976611	0.595729	0.529306	0.122552	0.378364	0.910279
17	17_2	ALGA0096471	TB	0.14143	0.228725	0.853518	0.44243	0.637473	0.234289
17	17_2	ALGA0096479	LW	0.876469	0.988725	0.728058	0.318586	0.231044	0.68365
17	17_2	ALGA0096479	TW	0.92282	0.992027	0.546364	0.0758233	0.477841	0.531382
17	17_2	ALGA0096479	LB	0.098797	0.767032	0.355819	0.438972	0.388663	0.673816
17	17_2	ALGA0096479	TB	0.112256	0.318653	0.267947	0.702022	0.722426	0.38975
17	17_2	ALGA0096492	LW	0.29587	0.659323	0.161752	0.784785	0.526396	0.786197
17	17_2	ALGA0096492	TW	0.730343	0.627654	0.259714	0.790786	0.41042	0.938782
17	17_2	ALGA0096492	LB	0.955606	0.881312	0.0621909	0.340629	0.878172	0.391517
17	17_2	ALGA0096492	TB	0.635702	0.832585	0.0526336	0.678012	0.678895	0.45902
17	17_2	ALGA0096504	LW	0.850875	0.602274	0.239435	0.432492	0.0649871	0.668774
17	17_2	ALGA0096504	TW	0.386884	0.685944	0.469061	0.60813	0.0826644	0.565261
17	17_2	ALGA0096504	LB	0.654139	0.275098	0.0087161	0.134838	0.192161	0.847476
17	17_2	ALGA0096504	TB	0.172421	0.455464	0.0167018	0.361986	0.0828473	0.716286
17	17_2	ALGA0096511	LW	0.283943			0.234254	0.635089	0.291834
17	17_2	ALGA0096511	TW	0.0869856			0.417481	0.142384	0.988718
17	17_2	ALGA0096511	LB	0.447527		0.312083	0.123079	0.550606	0.825884
17	17_2	ALGA0096511	TB	0.423398		0.375601	0.657017	0.383919	0.19506
17	17_2	ASGA0078301	LW	0.640936			0.897805
17	17_2	ASGA0078301	TW	0.718134			0.206804
17	17_2	ASGA0078301	LB	0.909238		0.269489	0.80525
17	17_2	ASGA0078301	TB	0.950854		0.442533	0.616894
17	17_2	ASGA0078341	LW	0.209216	0.846768	0.497383	0.163984	0.503945	0.14031
17	17_2	ASGA0078341	TW	0.46673	0.490301	0.661783	0.329394	0.255117	0.025921
17	17_2	ASGA0078341	LB	0.757339	0.659751	0.221163	0.0274998	0.92698	0.729706
17	17_2	ASGA0078341	TB	0.760438	0.584839	0.317295	0.262218	0.552232	0.0804057
17	17_2	H3GA0050000	LW	0.693296		0.808387	0.575549
17	17_2	H3GA0050000	TW	0.9212		0.562934	0.222873
17	17_2	H3GA0050000	LB	0.988718		0.215264	0.779219
17	17_2	H3GA0050000	TB	0.978896		0.43498	0.890374
17	17_2	H3GA0050013	LW	0.825654	0.346519	0.264099	0.961755	0.732352	0.652445
17	17_2	H3GA0050013	TW	0.44487	0.426468	0.143584	0.573125	0.485316	0.814773
17	17_2	H3GA0050013	LB	0.0464947	0.867366	0.0485516	0.671743	0.630369	0.775425
17	17_2	H3GA0050013	TB	0.058801	0.686921	0.0564002	0.912777	0.536734	0.517178
17	17_2	H3GA0050036	LW	0.185002	0.965257	0.860568	0.120678	0.27671	0.813125
17	17_2	H3GA0050036	TW	0.103545	0.562242	0.552591	0.0493666	0.082578	0.737467
17	17_2	H3GA0050036	LB	0.423252	0.720249	0.279607	0.776907	0.775157	0.547933
17	17_2	H3GA0050036	TB	0.86411	0.681058	0.606032	0.759916	0.282597	0.799839
17	17_2	H3GA0050045	LW	0.276514	0.309863	0.211448	0.423998	0.670566	0.0844091
17	17_2	H3GA0050045	TW	0.113768	0.731862	0.186858	0.377841	0.513401	0.126428
17	17_2	H3GA0050045	LB	0.176357	0.355086	0.26514	0.078762	0.941424	0.486031
17	17_2	H3GA0050045	TB	0.113276	0.703216	0.255925	0.108582	0.402436	0.723165
17	17_2	INRA0054886	LW	0.690144	0.386706	0.340393	0.734118	0.0289577	0.212576
17	17_2	INRA0054886	TW	0.736962	0.512434	0.787182	0.597291	0.123555	0.275698
17	17_2	INRA0054886	LB	0.821189	0.735346	0.196756	0.852658	0.537963	0.924844
17	17_2	INRA0054886	TB	0.598287	0.814942	0.604412	0.799534	0.606601	0.909928
17	17_2	INRA0054903	LW	0.496638	0.904224	0.13103	0.174585	0.557089	0.740639
17	17_2	INRA0054903	TW	0.904225	0.523415	0.395106	0.323075	0.336636	0.5061
17	17_2	INRA0054903	LB	0.506304	0.841506	0.0050555	0.0121676	0.828201	0.878172
17	17_2	INRA0054903	TB	0.774643	0.800927	0.003348	0.1502	0.549712	0.287846
17	17_2	INRA0054909	LW	0.113052	0.609214	0.937792	0.927857	0.778009	0.231517
17	17_2	INRA0054909	TW	0.821639	0.621792	0.717827	0.534595	0.759561	0.0826151
17	17_2	INRA0054909	LB	0.35489	0.760562	0.101313	0.210244	0.496083	0.874376
17	17_2	INRA0054909	TB	0.992023	0.778967	0.176865	0.608371	0.302033	0.953505
17	17_2	M1GA0022641	LW	0.499343	0.165854	0.671638	0.0311481	0.129995	0.123684
17	17_2	M1GA0022641	TW	0.650923	0.475065	0.260238	0.0189972	0.246855	0.0250382
17	17_2	M1GA0022641	LB	0.304541	0.0178851	0.245229	0.124722	0.615981	0.930535
17	17_2	M1GA0022641	TB	0.352015	0.0395527	0.109035	0.381298	0.866649	0.157749
17	17_2	M1GA0022670	LW	0.605227	0.561905	0.269581	0.227572	0.0402833	0.592476
17	17_2	M1GA0022670	TW	0.291669	0.375843	0.227724	0.0693671	0.272556	0.535498
17	17_2	M1GA0022670	LB	0.444983	0.828217	0.0869554	0.873879	0.398044	0.680849
17	17_2	M1GA0022670	TB	0.331865	0.625796	0.0641163	0.886158	0.739823	0.373979
17	17_2	M1GA0022677	LW	0.847582	0.490355	0.506377	0.325838	0.245643	0.673494
17	17_2	M1GA0022677	TW	0.890164	0.720638	0.36733	0.0979726	0.57036	0.559096
17	17_2	M1GA0022677	LB	0.158634	0.546767	0.810362	0.517878	0.44817	0.62172
17	17_2	M1GA0022677	TB	0.199108	0.251145	0.624419	0.82874	0.869971	0.58574
17	17_2	M1GA0022679	LW	0.752742	0.850455	0.832866	0.359405	0.258124	0.738595
17	17_2	M1GA0022679	TW	0.837551	0.988725	0.667044	0.113093	0.560306	0.538914
17	17_2	M1GA0022679	LB	0.079796	0.751033	0.736463	0.848292	0.659799	0.56593
17	17_2	M1GA0022679	TB	0.116422	0.370811	0.375751	0.806668	0.930992	0.621076
17	17_2	M1GA0022686	LW	0.0785547	0.622294	0.365496	0.643594	0.0688558	0.544396
17	17_2	M1GA0022686	TW	0.518474	0.711069	0.0611407	0.11668	0.197235	0.439751
17	17_2	M1GA0022686	LB	0.013415	0.914255	0.461422	0.557592	0.61946	0.929633
17	17_2	M1GA0022686	TB	0.0916639	0.686322	0.239931	0.686723	0.98046	0.798937
18	18_1	ALGA0097266	LW	0.734729	0.933371	0.882174	0.479679	0.939302	0.556289
18	18_1	ALGA0097266	TW	0.469974	0.892764	0.526791	0.988718	0.916861	0.740297
18	18_1	ALGA0097266	LB	0.340021	0.617144	0.570968	0.465563	0.525944	0.86502
18	18_1	ALGA0097266	TB	0.237051	0.336417	0.785776	0.439698	0.526664	0.562649
18	18_1	ALGA0097267	LW	0.549086	0.894539	0.719182	0.388977	0.852036	0.481576
18	18_1	ALGA0097267	TW	0.567765	0.766282	0.428701	0.826962	0.960933	0.746182
18	18_1	ALGA0097267	LB	0.95934	0.970158	0.812801	0.338908	0.32313	0.872399
18	18_1	ALGA0097267	TB	0.689027	0.788626	0.468149	0.354052	0.333812	0.361669
18	18_1	ALGA0097273	LW	0.524123	0.533501	0.802427	0.0015776	0.342213	0.85915
18	18_1	ALGA0097273	TW	0.503832	0.21789	0.363983	0.0041106	0.235031	0.926553
18	18_1	ALGA0097273	LB	0.046404	0.875891	1	0.0079171	0.14534	0.884787
18	18_1	ALGA0097273	TB	0.0286545	0.725636	0.51718	0.0032833	0.462936	0.889234
18	18_1	ALGA0097276	LW	0.569646	0.278832	0.081052	0.0718888	0.374552	0.162965
18	18_1	ALGA0097276	TW	0.351836	0.0712834	0.021423	0.0996033	0.0912531	0.278277
18	18_1	ALGA0097276	LB	0.0442699	0.502813	0.64683	0.308961	0.261234	0.423763
18	18_1	ALGA0097276	TB	0.0117794	0.396929	0.346517	0.180159	0.0357284	0.651538
18	18_1	ALGA0097282	LW	0.654125		0.342639	0.474583	0.731583	0.650372
18	18_1	ALGA0097282	TW	0.831951		0.130509	0.678125	0.968098	1
18	18_1	ALGA0097282	LB	0.95706	0.0632721	0.750199	0.922768	0.672863	0.216132
18	18_1	ALGA0097282	TB	0.974777	0.166011	0.523845	0.905819	0.283766	0.592311
18	18_1	ALGA0097286	LW	0.633019	0.425464	0.221655	0.758444	0.144643	0.676982
18	18_1	ALGA0097286	TW	0.588978	0.124114	0.291512	0.429151	0.0850349	0.399423
18	18_1	ALGA0097286	LB	0.931459	0.610604	0.594102	0.723376	0.485134	0.992022
18	18_1	ALGA0097286	TB	0.820846	0.732687	0.714472	0.465019	0.335499	0.948949
18	18_1	ALGA0097287	LW	0.590256	0.447864	0.21096	0.790351	0.126217	0.652765
18	18_1	ALGA0097287	TW	0.552933	0.140075	0.277751	0.491105	0.0533961	0.42556
18	18_1	ALGA0097287	LB	0.560144	0.732027	0.513708	0.619084	0.354472	0.980459
18	18_1	ALGA0097287	TB	0.445214	0.882639	0.644257	0.448407	0.214951	0.864098
18	18_1	ASGA0079076	LW	0.804289	0.857695	0.760831	0.374824	1	0.59973
18	18_1	ASGA0079076	TW	0.421281	0.866271	0.406133	0.873145	0.992022	0.852036
18	18_1	ASGA0079076	LB	0.333251	0.704485	0.673415	0.516678	0.47247	0.926548
18	18_1	ASGA0079076	TB	0.257551	0.458959	0.936746	0.497153	0.45812	0.476355
18	18_1	ASGA0079077	LW	0.986191	0.819076	0.257011	0.119574	0.5372	0.279649
18	18_1	ASGA0079077	TW	0.671728	0.800894	0.214246	0.34536	0.453835	0.344469
18	18_1	ASGA0079077	LB	0.122886	0.444668	0.620473	0.589357	0.668068	0.954193
18	18_1	ASGA0079077	TB	0.0853805	0.154449	0.771854	0.540167	0.630738	0.506537
18	18_1	ASGA0079079	LW	0.157269	0.411513	0.739782	0.420255	0.907857	0.525214
18	18_1	ASGA0079079	TW	0.739556	0.17109	0.684853	0.895672	0.738369	0.740753
18	18_1	ASGA0079079	LB	0.952832	0.720981	0.70273	0.393328	0.550885	1
18	18_1	ASGA0079079	TB	0.918397	0.71234	0.86071	0.439201	0.64656	0.465479
18	18_1	ASGA0079081	LW	0.616205	0.372593	0.880591	0.323668	0.86251	0.663552
18	18_1	ASGA0079081	TW	0.986191	0.493227	0.351041	0.800769	0.88237	0.875889
18	18_1	ASGA0079081	LB	0.312652	0.570191	0.21473	0.805721	0.706224	0.460498
18	18_1	ASGA0079081	TB	0.315754	0.56533	0.231359	0.917236	0.592182	0.785332
18	18_1	ASGA0079088	LW	0.136786	0.541289	0.262111	0.893288	0.893879	0.491561
18	18_1	ASGA0079088	TW	0.33255	0.247822	0.286572	0.475708	0.899045	0.52266
18	18_1	ASGA0079088	LB	0.381435	0.775581	0.965237	0.568	0.930992	0.538338
18	18_1	ASGA0079088	TB	0.254349	0.922775	0.887835	0.366882	0.599499	0.36753
18	18_1	ASGA0090721	LW	0.666198	0.667378	0.541611	0.0121555	0.578548	0.904496
18	18_1	ASGA0090721	TW	0.924474	0.881908	0.887899	0.0183132	0.708226	0.954197
18	18_1	ASGA0090721	LB	0.821189	0.191305	0.175791	0.191301	0.638003	0.63289
18	18_1	ASGA0090721	TB	0.718895	0.380319	0.0979101	0.193617	0.439316	0.427957
18	18_1	DRGA0016901	LW	0.325404	0.583691	0.47178	0.0472499	0.740639	0.908544
18	18_1	DRGA0016901	TW	0.755658	0.302093	0.138198	0.237082	0.32357	0.757457
18	18_1	DRGA0016901	LB	0.0539697	0.988718	0.36375	0.193315	0.804623	0.29001
18	18_1	DRGA0016901	TB	0.0663834	0.450455	0.130233	0.207093	0.467201	0.444837
18	18_1	INRA0055344	LW	0.73307	0.944234	0.500375	0.353221	0.931921	0.493214
18	18_1	INRA0055344	TW	0.472657	0.860567	0.497335	0.795786	0.841113	0.682661
18	18_1	INRA0055344	LB	0.453567	0.506689	0.685192	0.489237	0.508519	0.820315
18	18_1	INRA0055344	TB	0.3324	0.254075	0.89241	0.500862	0.535243	0.62919
18	18_1	INRA0055347	LW				0.654452		0.325862
18	18_1	INRA0055347	TW				0.626513		0.358179
18	18_1	INRA0055347	LB	0.8275			0.49115	0.194621	0.496315
18	18_1	INRA0055347	TB	0.72457			0.304977	0.178435	0.274857
18	18_1	INRA0055348	LW	0.51047	0.226202	0.0681527	0.126759	0.0328498	0.628266
18	18_1	INRA0055348	TW	0.387648	0.084251	0.0237889	0.136355	0.0014461	0.782685
18	18_1	INRA0055348	LB	0.0531534	0.58889	0.641938	0.527232	0.685342	0.0833279
18	18_1	INRA0055348	TB	0.0183621	0.485819	0.442302	0.499824	0.605788	0.108891
18	18_1	INRA0055349	LW	0.21861	0.887342	0.534616	0.476315	0.219697	0.639325
18	18_1	INRA0055349	TW	0.723789	0.760212	0.672418	0.254164	0.117021	0.400253
18	18_1	INRA0055349	LB	0.591323	0.346681	0.453688	0.548654	0.63536	0.818951
18	18_1	INRA0055349	TB	0.565859	0.369918	0.579544	0.349609	0.403242	0.699899
18	18_1	INRA0055352	LW				0.618972		0.32757
18	18_1	INRA0055352	TW				0.679274		0.333697
18	18_1	INRA0055352	LB	0.825546			0.483303	0.198442	0.496222
18	18_1	INRA0055352	TB	0.720249			0.295325	0.18146	0.27857
